# Supplementary material for: The use of ambient humidity conditions to improve influenza forecast
Source: PLoS Comput Biol. 2017 Nov 16;13(11):e1005844. doi: 10.1371/journal.pcbi.1005844 (PMC5708837; doi:10.1371/journal.pcbi.1005844)
Supplement: S1 Data — (CSV) [file pcbi.1005844.s001.csv]

Date	Birmingham, AL	Little Rock, AR	Mesa, AZ	Phoenix, AZ	Scottsdale, AZ	Tempe, AZ	Tucson, AZ	Berkeley, CA	Fresno, CA	Irvine, CA	Los Angeles, CA	Oakland, CA	Sacramento, CA	San Diego, CA	San Francisco, CA	San Jose, CA	Santa Clara, CA	Sunnyvale, CA	Colorado Springs, CO	Denver, CO	Washington, DC	Gainesville, FL	Jacksonville, FL	Miami, FL	Orlando, FL	Tampa, FL	Atlanta, GA	Roswell, GA	Des Moines, IA	Boise, ID	Chicago, IL	Indianapolis, IN	Wichita, KS	Lexington, KY	Baton Rouge, LA	New Orleans, LA	Boston, MA	Somerville, MA	Baltimore, MD	Grand Rapids, MI	St Paul, MN	Kansas City, MO	Springfield, MO	St Louis, MO	Jackson, MS	Cary, NC	Charlotte, NC	Durham, NC	Greensboro, NC
2003-09-28	0	NA	NA	0	NA	0	0	NA	NA	NA	23	21	11	14	25	18	25	15	NA	0	0	NA	NA	0	0	0	0	NA	NA	NA	0	0	NA	NA	NA	235	0	0	0	NA	0	0	NA	0	NA	NA	0	0	NA
2003-10-05	0	NA	NA	0	NA	0	0	NA	NA	NA	12	12	6	11	15	10	12	8	NA	0	0	NA	NA	0	0	0	0	NA	NA	NA	0	0	NA	NA	NA	546	0	0	0	NA	0	0	NA	0	NA	NA	0	0	NA
2003-10-12	0	NA	NA	0	NA	0	0	NA	NA	NA	113	81	45	91	127	80	96	59	NA	0	14	7	NA	4	6	6	5	NA	NA	NA	0	0	NA	NA	NA	1002	0	0	16	NA	5	3	NA	4	NA	NA	8	5	NA
2003-10-19	39	NA	NA	68	NA	54	64	NA	NA	NA	170	117	73	154	210	141	150	89	NA	26	33	20	NA	11	20	18	16	NA	NA	NA	9	8	NA	NA	NA	1454	0	0	43	NA	12	10	NA	11	NA	NA	23	16	NA
2003-10-26	45	NA	NA	337	NA	244	433	NA	NA	NA	69	68	39	74	103	84	80	48	NA	131	96	51	NA	31	49	44	63	NA	NA	NA	13	9	NA	NA	NA	2447	38	50	109	NA	7	6	NA	7	NA	NA	69	43	NA
2003-11-02	68	NA	NA	793	NA	579	1133	NA	NA	NA	222	158	109	174	242	176	225	124	NA	604	546	264	NA	160	286	251	277	NA	NA	NA	139	83	NA	NA	NA	3474	68	84	539	NA	13	11	NA	13	NA	NA	350	216	NA
2003-11-09	102	NA	NA	1515	NA	968	2457	NA	NA	NA	615	395	343	374	999	410	514	423	NA	2727	676	344	NA	193	390	282	279	NA	NA	NA	386	233	NA	NA	NA	3872	99	119	577	NA	141	107	NA	162	NA	NA	383	293	NA
2003-11-16	298	NA	NA	3742	NA	1340	5698	NA	NA	NA	1325	1175	962	1075	1804	846	1316	1326	NA	4550	1358	778	NA	375	610	567	950	NA	NA	NA	720	389	NA	NA	NA	3913	237	226	1124	NA	265	241	NA	319	NA	NA	614	703	NA
2003-11-23	558	NA	NA	5532	NA	2956	5793	NA	NA	NA	2336	1910	2026	2040	3929	1823	2618	2429	NA	8219	2777	1714	NA	675	1371	1159	2340	772	NA	NA	1343	640	NA	NA	NA	3731	576	483	2625	NA	455	640	NA	794	NA	NA	1382	1529	NA
2003-11-30	1535	NA	NA	10156	NA	7877	7054	NA	NA	NA	4535	5280	2960	5783	6596	4921	6285	8506	NA	6166	3420	2086	NA	1097	2205	1499	3636	1169	NA	NA	2488	3753	NA	NA	NA	2925	1236	1589	4586	NA	1103	1942	NA	2309	NA	NA	2596	3229	NA
2003-12-07	5649	NA	NA	9911	NA	9757	9291	NA	3205	NA	7300	11789	4362	8678	10831	10997	6958	13973	NA	3797	5650	3239	NA	2421	5607	3661	8683	3675	NA	NA	4931	8888	NA	NA	NA	3490	2889	3045	7735	NA	2393	4100	NA	4001	NA	NA	8730	13239	NA
2003-12-14	10511	NA	NA	7541	NA	6143	5849	NA	5719	NA	9169	11111	5195	8110	10659	10152	6106	12881	NA	2201	6519	5419	NA	4928	7856	5946	11590	9663	NA	NA	5860	8455	NA	NA	NA	3583	5383	7636	9512	NA	5086	5585	NA	5402	NA	NA	8823	16504	NA
2003-12-21	6859	NA	NA	4721	NA	4891	4207	NA	4120	NA	6215	6682	3380	6951	5151	6113	4488	8276	NA	1297	5796	5652	NA	6191	6740	7389	8051	7931	NA	NA	4271	6059	NA	NA	NA	1915	5319	7538	8860	NA	6285	4863	NA	4156	NA	NA	8058	12933	NA
2003-12-28	4358	NA	NA	1269	NA	1724	1451	NA	2311	NA	1956	2929	1702	2064	1843	2116	2121	3072	NA	431	3563	4500	NA	3640	4004	3391	2788	5063	NA	NA	2604	3929	NA	NA	NA	1289	3012	3607	4782	NA	5894	3181	NA	1845	NA	NA	3692	7505	NA
2004-01-04	1681	NA	NA	669	NA	1045	930	NA	1644	NA	778	1632	888	1003	788	963	1213	1433	NA	228	1418	2202	NA	1182	1526	1149	1189	2312	NA	NA	733	1045	NA	NA	NA	663	2126	2094	1966	NA	2141	1026	NA	698	NA	NA	1369	2755	NA
2004-01-11	1251	NA	NA	271	NA	467	357	NA	879	NA	301	773	481	388	409	389	514	655	NA	80	933	1414	NA	653	888	764	576	1427	NA	NA	233	328	NA	NA	NA	297	1270	1224	1354	NA	1285	716	NA	443	NA	NA	821	1600	NA
2004-01-18	128	NA	NA	83	NA	147	117	NA	551	NA	185	434	273	187	252	212	256	349	NA	24	281	533	NA	229	309	298	236	532	NA	NA	165	235	NA	NA	NA	188	467	448	518	NA	1081	564	NA	387	NA	NA	334	546	NA
2004-01-25	50	NA	NA	12	NA	21	15	NA	323	NA	113	256	152	117	130	122	151	183	NA	4	166	278	NA	116	182	157	122	270	NA	NA	59	73	NA	NA	NA	165	527	617	275	NA	282	146	NA	95	NA	NA	171	285	NA
2004-02-01	93	NA	NA	59	NA	95	70	NA	240	NA	71	179	111	89	73	88	103	135	NA	18	103	159	NA	67	94	84	82	159	NA	NA	20	28	NA	NA	NA	84	241	303	166	NA	180	103	NA	69	NA	NA	104	155	NA
2004-02-08	20	NA	NA	0	NA	0	0	NA	110	NA	49	85	51	38	38	43	49	60	NA	0	121	155	NA	71	102	82	80	144	NA	NA	6	7	NA	NA	NA	24	128	147	173	NA	72	42	NA	27	NA	NA	98	148	NA
2004-02-15	26	NA	NA	20	NA	22	16	NA	94	NA	44	76	44	36	46	37	43	49	NA	4	28	31	NA	15	19	17	16	30	NA	NA	25	36	NA	NA	NA	12	381	432	36	NA	64	38	NA	26	NA	NA	18	30	NA
2004-02-22	21	NA	NA	0	NA	0	0	NA	41	NA	21	32	21	20	25	16	21	22	NA	0	112	130	NA	66	72	78	69	127	NA	NA	36	41	NA	NA	NA	15	0	0	161	NA	178	111	NA	83	NA	NA	76	145	NA
2004-02-29	0	NA	NA	14	NA	14	12	NA	31	NA	15	24	17	16	14	13	17	17	NA	4	15	17	NA	8	10	10	8	16	NA	NA	13	12	NA	NA	NA	13	78	91	22	NA	28	18	NA	17	NA	NA	9	18	NA
2004-03-07	30	NA	NA	17	NA	16	13	NA	13	NA	5	10	7	7	7	5	7	7	NA	4	0	0	NA	0	0	0	0	0	NA	NA	10	9	NA	NA	NA	15	25	31	0	NA	17	11	NA	10	NA	NA	0	0	NA
2004-03-14	0	NA	NA	0	NA	0	0	NA	13	NA	5	10	8	7	8	5	7	8	NA	0	20	21	NA	10	12	12	9	18	NA	NA	17	17	NA	NA	NA	14	149	182	29	NA	7	4	NA	4	NA	NA	11	22	NA
2004-03-21	0	NA	NA	40	NA	43	40	NA	29	NA	20	25	18	15	18	12	16	17	NA	11	0	0	NA	0	0	0	0	0	NA	NA	36	41	NA	NA	NA	0	193	200	0	NA	16	10	NA	11	NA	NA	0	0	NA
2004-03-28	0	NA	NA	27	NA	34	33	NA	29	NA	14	25	19	14	16	13	16	19	NA	8	8	8	NA	4	5	5	4	7	NA	NA	0	0	NA	NA	NA	0	86	85	11	NA	0	0	NA	0	NA	NA	4	9	NA
2004-04-04	0	NA	NA	0	NA	0	0	NA	0	NA	0	0	0	0	0	0	0	0	NA	0	10	9	NA	5	6	6	6	8	NA	NA	9	12	NA	NA	NA	0	95	81	13	NA	0	0	NA	0	NA	NA	5	10	NA
2004-04-11	0	NA	NA	13	NA	18	17	NA	60	NA	35	56	38	37	37	30	41	39	NA	4	0	0	NA	0	0	0	0	0	NA	NA	12	18	NA	NA	NA	20	0	0	0	NA	0	0	NA	0	NA	NA	0	0	NA
2004-04-18	24	NA	NA	0	NA	0	0	NA	46	NA	32	42	29	28	29	22	31	30	NA	0	39	37	NA	22	28	25	20	32	NA	NA	15	26	NA	NA	NA	0	88	85	54	NA	0	0	NA	0	NA	NA	25	39	NA
2004-04-25	0	NA	NA	19	NA	26	26	NA	15	NA	11	14	10	9	12	8	11	11	NA	7	0	0	NA	0	0	0	0	0	NA	NA	0	0	NA	NA	NA	38	222	214	0	NA	0	0	NA	0	NA	NA	0	0	NA
2004-05-02	0	NA	NA	34	NA	43	48	NA	19	NA	12	18	12	11	15	11	14	16	NA	13	11	10	NA	7	7	7	5	8	NA	NA	6	10	NA	NA	NA	0	0	0	14	NA	0	0	NA	0	NA	NA	7	10	NA
2004-05-09	0	NA	NA	0	NA	0	0	NA	0	NA	0	0	0	0	0	0	0	0	NA	0	0	0	NA	0	0	0	0	0	NA	NA	9	13	NA	NA	NA	0	0	0	0	NA	0	0	NA	0	NA	NA	0	0	NA
2004-05-16	0	NA	NA	16	NA	18	20	NA	27	NA	15	26	16	16	17	18	20	25	NA	6	0	0	NA	0	0	0	0	0	NA	NA	0	0	NA	NA	NA	0	0	0	0	NA	0	0	NA	0	NA	NA	0	0	NA
2004-05-23	0	NA	NA	21	NA	24	27	NA	43	NA	26	44	27	24	28	29	35	41	NA	8	0	0	NA	0	0	0	0	0	NA	NA	12	13	NA	NA	NA	0	0	0	0	NA	0	0	NA	0	NA	NA	0	0	NA
2004-05-30	0	NA	NA	0	NA	0	0	NA	61	NA	44	65	40	36	57	42	54	57	NA	0	30	29	NA	19	21	16	15	23	NA	NA	0	0	NA	NA	NA	0	0	0	42	NA	0	0	NA	0	NA	NA	21	28	NA
2004-06-06	0	NA	NA	0	NA	0	0	NA	24	NA	18	26	16	18	21	18	21	24	NA	0	0	0	NA	0	0	0	0	0	NA	NA	0	0	NA	NA	NA	31	0	0	0	NA	0	0	NA	0	NA	NA	0	0	NA
2004-06-13	0	NA	NA	0	NA	0	0	NA	24	NA	15	27	17	19	24	18	23	25	NA	0	0	0	NA	0	0	0	0	0	NA	NA	0	0	NA	NA	NA	0	0	0	0	NA	0	0	NA	0	NA	NA	0	0	NA
2004-06-20	0	NA	NA	0	NA	0	0	NA	14	NA	10	15	9	14	13	11	13	13	NA	0	23	18	NA	11	12	11	9	15	NA	NA	0	0	NA	NA	NA	0	0	0	29	NA	0	0	NA	0	NA	NA	13	18	NA
2004-06-27	0	NA	NA	0	NA	0	0	NA	24	NA	21	27	18	24	23	19	22	27	NA	0	0	0	NA	0	0	0	0	0	NA	NA	0	0	NA	NA	NA	48	0	0	0	NA	0	0	NA	0	NA	NA	0	0	NA
2004-07-04	0	NA	NA	0	NA	0	0	NA	16	NA	15	18	12	15	13	14	15	17	NA	0	0	0	NA	0	0	0	0	0	NA	NA	0	0	NA	NA	NA	0	0	0	0	NA	0	0	NA	0	NA	NA	0	0	NA
2004-07-11	0	NA	NA	21	NA	18	23	NA	0	NA	0	0	0	0	0	0	0	0	NA	7	0	0	NA	0	0	0	0	0	NA	NA	0	0	NA	NA	NA	0	0	0	0	NA	0	0	NA	0	NA	NA	0	0	NA
2004-07-18	0	NA	NA	0	NA	0	0	NA	25	NA	26	29	20	22	23	19	20	27	NA	0	0	0	NA	0	0	0	0	0	NA	NA	0	0	NA	NA	NA	0	0	0	0	NA	0	0	NA	0	NA	NA	0	0	NA
2004-07-25	0	NA	NA	0	NA	0	0	NA	0	NA	0	0	0	0	0	0	0	0	NA	0	0	0	NA	0	0	0	0	0	NA	NA	0	0	NA	NA	NA	0	0	0	0	NA	0	0	NA	0	NA	NA	0	0	NA
2004-08-01	0	NA	NA	0	NA	0	0	NA	16	NA	14	17	13	14	15	11	11	16	NA	0	0	0	NA	0	0	0	0	0	NA	NA	0	0	NA	NA	NA	58	0	0	0	NA	0	0	NA	0	NA	NA	0	0	NA
2004-08-08	0	NA	NA	0	NA	0	0	NA	0	NA	0	0	0	0	0	0	0	0	NA	0	46	36	NA	25	21	22	18	25	NA	NA	0	0	NA	NA	NA	0	0	0	50	NA	0	0	NA	0	NA	NA	21	26	NA
2004-08-15	0	NA	NA	0	NA	0	0	NA	12	NA	10	12	27	10	16	8	8	12	NA	0	0	0	NA	0	0	0	0	0	NA	NA	0	0	NA	NA	NA	0	0	0	0	NA	0	0	NA	0	NA	NA	0	0	NA
2004-08-22	0	NA	NA	0	NA	0	0	NA	13	NA	12	13	31	11	16	9	10	13	NA	0	30	25	NA	19	16	16	16	17	NA	NA	0	0	NA	NA	NA	0	0	0	35	NA	0	0	NA	0	NA	NA	16	18	NA
2004-08-29	0	NA	NA	0	NA	0	0	NA	10	NA	13	10	21	8	11	8	8	10	NA	0	0	0	NA	0	0	0	0	0	NA	NA	12	11	NA	NA	NA	27	48	40	0	NA	0	0	NA	0	NA	NA	0	0	NA
2004-09-05	0	NA	NA	0	NA	0	0	NA	18	NA	27	18	36	17	24	15	19	19	NA	0	0	0	NA	0	0	0	0	0	NA	NA	0	0	NA	NA	NA	0	0	0	0	NA	0	0	NA	0	NA	NA	0	0	NA
2004-09-12	0	NA	NA	0	NA	0	0	NA	19	NA	30	21	36	23	25	18	25	21	NA	0	0	0	NA	0	0	0	0	0	NA	NA	14	10	NA	NA	NA	0	0	0	0	NA	0	0	NA	0	NA	NA	0	0	NA
2004-09-19	0	NA	NA	18	NA	20	26	0	0	NA	0	0	0	0	0	0	0	0	8	8	0	0	NA	0	0	0	0	0	NA	NA	0	0	NA	NA	NA	0	35	46	0	NA	0	0	NA	0	NA	NA	0	0	NA
2004-09-26	0	NA	NA	134	NA	145	169	24	18	NA	33	19	49	24	30	21	29	21	52	54	35	19	NA	16	13	16	13	12	NA	NA	18	13	9	0	0	0	0	0	32	NA	14	13	NA	13	NA	16	21	16	NA
2004-10-03	11	0	NA	19	NA	15	19	37	23	25	50	26	67	31	58	30	43	35	6	8	33	16	9	13	12	13	11	9	NA	22	22	17	0	10	0	0	0	0	28	11	0	0	NA	0	NA	12	17	13	NA
2004-10-10	0	13	NA	24	NA	26	35	40	25	26	62	26	73	44	78	38	50	42	8	13	19	8	5	7	6	6	8	5	NA	23	47	34	0	0	12	11	6	13	24	16	0	0	NA	0	NA	6	10	6	NA
2004-10-17	0	23	NA	37	NA	37	42	42	26	38	71	32	93	76	82	55	65	81	8	20	70	25	15	23	33	21	31	15	36	25	110	105	26	0	22	21	0	0	83	48	97	52	NA	60	NA	19	33	21	NA
2004-10-24	0	0	NA	14	9	14	19	40	22	32	60	30	69	58	69	44	61	79	3	8	241	95	56	90	142	75	100	59	24	24	68	80	15	0	0	0	11	15	297	41	57	34	NA	38	NA	76	134	84	NA
2004-10-31	0	0	NA	55	38	58	81	260	133	205	317	212	399	305	351	269	355	596	11	27	32	14	10	12	20	12	17	10	44	138	44	48	27	0	0	0	27	34	37	41	128	69	NA	68	NA	13	21	15	NA
2004-11-07	0	0	69	108	86	169	150	227	119	168	229	186	269	229	233	197	282	469	38	63	12	8	6	6	9	7	9	9	21	136	63	68	10	0	0	0	18	19	18	68	48	27	NA	23	NA	8	10	9	NA
2004-11-14	0	12	109	156	138	257	220	180	97	153	140	147	212	146	202	129	211	300	72	86	45	43	27	22	34	30	33	41	65	114	102	112	25	0	11	12	25	35	60	137	132	71	NA	58	0	43	37	41	19
2004-11-21	0	13	60	90	91	126	109	117	68	130	96	111	152	95	94	83	156	174	40	44	74	65	47	32	50	49	42	63	62	85	108	110	21	0	12	11	66	93	95	144	91	49	NA	36	0	76	57	67	30
2004-11-28	23	21	140	187	217	226	241	275	145	282	222	313	297	258	272	209	349	311	81	87	87	71	55	35	48	55	53	70	112	213	189	205	56	17	22	16	82	131	99	216	176	91	NA	78	19	77	57	70	41
2004-12-05	149	44	169	209	257	233	219	289	148	254	248	298	260	229	246	207	294	278	86	86	208	208	140	109	111	147	127	193	134	198	228	220	77	116	45	36	171	214	298	228	191	108	NA	87	125	185	172	168	118
2004-12-12	158	87	255	234	310	260	280	304	168	253	245	295	277	218	241	233	299	322	97	89	146	137	103	83	86	111	102	137	228	189	222	222	144	123	88	65	399	513	215	191	356	205	NA	175	151	135	123	127	105
2004-12-19	149	137	427	331	432	397	375	253	167	224	198	240	254	187	306	229	271	319	141	137	601	401	310	248	408	309	329	432	342	156	910	833	221	112	132	104	530	874	635	758	525	315	NA	249	146	475	409	398	340
2004-12-26	251	631	541	440	502	496	451	682	456	578	597	662	815	632	1134	696	1024	997	177	261	524	296	212	178	406	219	267	289	485	419	1467	1223	380	171	577	491	1031	1905	456	962	950	474	NA	363	226	359	280	302	260
2005-01-02	600	851	931	780	848	1002	915	734	475	643	803	697	859	875	941	997	1158	1051	290	371	932	442	378	403	520	558	539	461	639	449	1245	1077	526	407	805	794	1763	2297	926	937	1657	616	NA	457	517	735	577	537	433
2005-01-09	503	1040	1366	1266	1314	1418	1417	722	507	720	678	751	793	661	1255	1045	1089	1168	499	487	928	495	368	355	488	460	445	461	581	432	1579	1225	508	454	1043	1266	1177	1109	1009	997	1780	622	NA	479	457	877	557	635	464
2005-01-16	592	1469	1503	1236	1192	1369	1352	999	696	1022	1123	1115	1173	924	1390	1503	1532	2211	643	675	1074	729	448	484	602	554	650	615	816	688	1921	1278	751	514	1501	1948	981	1234	1419	1301	2229	818	NA	562	498	1095	667	822	613
2005-01-23	1004	2167	1764	1276	1320	1414	1481	1330	1184	1245	1403	1219	1437	1098	1874	1892	1844	2793	846	1252	1373	1443	596	687	812	834	1059	744	997	868	1854	1251	779	852	2032	2449	713	850	1996	1182	2785	1059	NA	788	738	1198	828	1228	788
2005-01-30	1754	4398	1750	1314	1523	1348	1752	1883	2031	1826	1797	1976	2064	1257	3133	2584	2387	3272	898	1129	2610	2581	925	1001	1508	1702	2111	1195	1151	1390	1986	1653	745	1806	3690	4949	696	887	3437	1484	2899	959	NA	899	1351	1668	1726	1912	1287
2005-02-06	3223	8614	1531	1385	1397	1303	2132	1936	2207	1903	2256	2625	2301	1471	2496	2991	2328	3787	867	1102	3088	2743	1166	1033	1389	1683	2735	1523	1516	1901	2529	2337	787	3298	4488	6107	927	968	4057	2773	2434	999	NA	1312	3547	2044	1882	3203	1502
2005-02-13	4197	8800	1761	1645	1434	1354	2599	2708	2208	2026	2237	2857	2450	2214	2957	2740	2789	4485	961	923	3308	2605	1829	1115	1380	1933	2678	2336	1429	1978	1681	1949	747	4947	6799	6123	632	715	3744	1859	1815	899	NA	1268	5818	3939	2127	3846	1782
2005-02-20	5030	7063	1756	1393	1305	1540	2230	1961	1538	1547	1365	2306	1742	1285	1967	1728	1787	2590	765	719	2282	2295	1583	1040	1467	1623	2305	1989	1326	1737	1604	2169	839	5450	6401	5358	404	600	2852	1856	1325	982	NA	1125	7399	3870	1894	3344	1977
2005-02-27	2752	3972	1412	1141	960	1317	1227	1603	1170	1119	838	1823	1209	774	973	1261	1366	1933	593	544	2099	2618	2034	896	1735	1486	1983	1919	1058	1459	1127	1324	781	2342	4226	3218	248	424	2792	1172	997	883	NA	872	3829	4040	2156	3227	2632
2005-03-06	1948	2117	1149	831	863	1116	910	947	709	774	645	1097	895	466	740	717	759	1154	438	368	1737	1919	1523	625	1271	1050	1596	1334	795	1008	734	1006	545	1583	1993	1452	218	471	2065	787	694	623	NA	604	2760	3039	1970	2501	2361
2005-03-13	2307	1409	865	574	672	841	634	962	640	696	422	905	649	409	658	636	665	961	348	234	1782	1814	1490	628	1134	1160	1721	1472	693	850	627	992	487	1919	1302	973	225	501	2193	758	597	552	NA	504	3004	2882	1905	2394	2493
2005-03-20	1960	798	788	479	628	701	625	721	476	518	375	554	467	326	376	472	448	660	307	182	1115	1165	1085	526	876	992	939	1086	683	612	510	782	493	1748	707	539	259	378	1498	647	578	541	NA	485	2514	2208	1273	1620	1721
2005-03-27	1371	577	460	218	319	358	411	597	425	487	336	423	511	323	374	427	433	545	161	96	1003	883	901	458	743	713	567	814	362	596	213	318	263	1365	528	402	170	229	1133	329	349	291	NA	225	1831	1499	881	1238	1280
2005-04-03	478	494	572	301	394	391	455	663	485	535	391	406	665	352	453	469	457	632	208	116	466	457	456	294	415	362	266	439	298	602	178	233	228	510	434	339	161	290	611	262	314	238	NA	181	681	771	424	608	692
2005-04-10	235	135	322	191	215	238	267	497	386	415	305	363	551	297	348	337	376	539	109	62	177	174	179	118	146	141	99	168	145	480	89	134	116	271	116	92	70	96	228	150	155	115	NA	83	357	291	148	237	275
2005-04-17	128	70	421	301	313	307	378	281	220	229	160	211	316	152	175	205	233	293	143	76	80	83	77	54	62	55	48	79	67	276	28	45	51	143	58	47	92	121	108	48	74	51	NA	37	189	129	63	106	121
2005-04-24	33	0	432	306	306	300	351	141	113	122	80	105	155	84	86	102	107	130	145	71	54	55	49	33	35	36	33	49	0	131	40	62	0	39	0	0	45	43	71	66	0	0	NA	0	51	79	38	65	77
2005-05-01	0	0	297	212	222	215	243	120	101	104	58	78	134	70	77	82	99	123	95	46	58	62	52	34	37	38	41	50	8	109	10	13	6	0	0	0	68	67	79	13	9	6	NA	4	0	84	40	72	83
2005-05-08	0	36	388	266	289	277	304	62	55	52	29	39	78	44	39	43	51	56	118	57	8	7	6	4	4	5	4	6	7	53	23	35	6	0	30	23	0	0	9	37	9	6	NA	4	0	10	4	8	10
2005-05-15	0	0	496	309	345	347	342	65	63	56	45	38	81	43	52	45	49	52	133	66	9	8	6	4	4	5	4	6	0	53	10	13	0	0	0	0	5	5	11	14	0	0	NA	0	0	10	4	9	10
2005-05-22	0	36	385	233	246	266	239	112	106	101	88	69	132	70	124	85	97	89	95	44	0	0	0	0	0	0	0	0	7	90	0	0	5	0	30	25	0	0	0	0	8	5	NA	4	0	0	0	0	0
2005-05-29	0	0	196	117	129	130	109	131	108	106	73	78	132	68	107	83	95	101	47	23	0	0	0	0	0	0	0	0	0	93	0	0	0	0	0	0	0	0	0	0	0	0	NA	0	0	0	0	0	0
2005-06-05	0	32	131	73	88	92	70	55	47	43	30	39	57	31	37	36	39	40	30	15	0	0	0	0	0	0	0	0	0	38	0	0	0	0	27	23	0	0	0	0	0	0	NA	0	0	0	0	0	0
2005-06-12	0	0	99	49	64	67	51	101	81	80	55	71	113	54	72	68	72	68	22	12	0	0	0	0	0	0	0	0	8	66	0	0	6	0	0	0	0	0	0	0	9	6	NA	5	0	0	0	0	0
2005-06-19	0	0	47	23	31	31	24	75	63	61	49	48	89	48	49	53	59	55	11	6	0	0	0	0	0	0	0	0	0	49	11	16	0	0	0	0	8	11	0	14	0	0	NA	0	0	0	0	0	0
2005-06-26	0	0	27	13	18	18	13	14	12	12	9	9	19	10	9	11	11	10	6	4	0	0	0	0	0	0	0	0	0	10	0	0	0	0	0	0	0	0	0	0	0	0	NA	0	0	0	0	0	0
2005-07-03	0	106	43	22	29	28	21	20	16	16	13	12	27	13	15	13	13	14	10	7	0	0	0	0	0	0	0	0	0	13	0	0	0	0	94	96	0	0	0	0	0	0	NA	0	0	0	0	0	0
2005-07-10	0	86	0	0	0	0	0	0	0	0	0	0	0	0	0	0	0	0	0	0	0	0	0	0	0	0	0	0	0	0	0	0	0	0	77	82	0	0	0	0	0	0	NA	0	0	0	0	0	0
2005-07-17	0	0	0	0	0	0	0	15	14	15	10	9	18	11	13	12	12	13	0	0	0	0	0	0	0	0	0	0	0	11	0	0	0	0	0	0	7	8	0	0	0	0	NA	0	0	0	0	0	0
2005-07-24	0	0	0	0	0	0	0	25	25	24	18	15	28	20	22	24	20	22	0	0	0	0	0	0	0	0	0	0	0	17	0	0	0	0	0	0	0	0	0	0	0	0	NA	0	0	0	0	0	0
2005-07-31	0	0	0	0	0	0	0	0	0	0	0	0	0	0	0	0	0	0	0	0	0	0	0	0	0	0	0	0	0	0	0	0	0	0	0	0	0	0	0	0	0	0	NA	0	0	0	0	0	0
2005-08-07	0	0	0	0	0	0	0	0	0	0	0	0	0	0	0	0	0	0	0	0	0	0	0	0	0	0	0	0	0	0	0	0	0	0	0	0	0	0	0	0	0	0	NA	0	0	0	0	0	0
2005-08-14	0	129	29	15	22	15	15	0	0	0	0	0	0	0	0	0	0	0	7	6	0	0	0	0	0	0	0	0	0	0	0	0	0	0	119	148	11	16	0	0	0	0	NA	0	0	0	0	0	0
2005-08-21	0	0	0	0	0	0	0	28	25	28	23	29	22	23	29	27	26	28	0	0	35	28	19	21	19	20	18	21	0	19	0	0	0	0	0	0	0	0	39	0	0	0	NA	0	0	27	15	25	23
2005-08-28	0	36	0	0	0	0	0	27	21	26	21	24	20	22	26	25	25	27	0	0	0	0	0	0	0	0	0	0	0	16	15	12	0	0	34	40	0	0	0	10	0	0	NA	0	0	0	0	0	0
2005-09-04	0	0	0	0	0	0	0	12	11	13	10	12	9	12	12	13	12	13	0	0	0	0	0	0	0	0	0	0	0	8	0	0	0	0	0	0	0	0	0	0	0	0	NA	0	0	0	0	0	0
2005-09-11	0	0	0	0	0	0	0	53	51	63	61	52	54	59	77	57	63	84	0	0	0	0	0	0	0	0	0	0	0	34	0	0	0	0	0	0	0	0	0	0	0	0	NA	0	0	0	0	0	0
2005-09-18	0	0	0	0	0	0	0	23	26	27	31	37	23	34	38	26	28	47	0	0	0	0	0	0	0	0	0	0	0	16	0	0	0	0	0	0	0	0	0	0	0	0	NA	0	0	0	0	0	0
2005-09-25	0	0	18	18	15	18	30	19	21	20	23	31	31	30	27	21	24	35	5	9	47	31	23	33	31	25	28	28	0	13	0	0	0	0	0	0	0	0	56	0	0	0	NA	0	0	26	21	30	20
2005-10-02	0	0	0	0	0	0	0	74	82	72	104	128	150	106	113	71	84	118	0	0	11	7	4	6	6	5	6	5	0	46	0	0	0	0	0	0	0	0	13	0	0	0	NA	0	0	5	5	6	4
2005-10-09	0	47	0	0	0	0	0	55	68	64	95	127	113	79	113	57	75	88	0	0	27	12	9	13	14	9	11	11	0	44	0	0	0	0	42	37	0	0	23	0	0	0	NA	0	0	9	9	12	6
2005-10-16	0	125	10	19	13	19	19	137	163	169	168	195	208	136	221	122	151	171	4	9	64	45	32	41	43	33	37	44	0	105	22	29	0	0	104	89	0	0	78	18	0	0	NA	0	0	32	35	43	19
2005-10-23	0	47	10	18	15	20	17	56	73	72	64	61	81	71	57	47	66	65	4	8	20	13	8	10	11	9	8	11	10	49	0	0	9	0	44	32	11	14	21	0	18	11	NA	9	0	12	10	13	5
2005-10-30	0	53	24	38	40	38	40	186	226	228	192	271	234	227	246	173	214	257	11	19	18	14	8	9	11	10	9	13	0	199	0	0	0	0	47	31	0	0	20	0	0	0	0	0	0	16	13	13	5
2005-11-06	0	50	80	90	95	94	108	242	244	285	234	278	248	246	268	247	267	242	35	38	26	22	14	12	17	15	14	20	0	252	0	0	0	0	50	30	20	17	27	0	0	0	0	0	0	24	17	19	9
2005-11-13	0	161	176	138	166	177	243	84	77	101	95	103	81	98	94	88	94	92	67	51	9	7	4	4	5	6	4	7	13	87	74	69	13	0	144	87	0	0	8	65	23	12	6	9	0	7	6	6	4
2005-11-20	0	153	211	144	174	199	259	146	130	153	157	182	148	166	203	176	157	187	74	58	40	33	21	18	20	28	22	34	13	162	25	27	13	0	141	90	0	0	40	23	23	11	7	8	0	33	26	29	26
2005-11-27	27	201	264	199	222	259	311	327	312	365	383	367	412	438	431	396	336	423	103	62	75	62	42	39	43	50	49	60	15	380	107	137	16	22	191	116	26	26	94	113	26	13	10	11	27	68	52	63	58
2005-12-04	56	414	1386	1322	1355	1634	1749	376	320	412	663	503	415	497	395	379	322	473	527	324	179	153	99	88	130	109	127	133	41	381	139	175	42	44	388	245	22	22	213	138	64	36	33	31	50	147	123	127	166
2005-12-11	68	738	2968	7124	2701	4234	4405	751	734	1086	1400	1067	925	1459	967	745	625	1046	880	648	121	109	71	55	92	72	73	88	99	639	336	359	94	54	593	394	21	22	139	263	136	79	77	71	62	95	86	96	109
2005-12-18	130	1367	4484	8111	4507	10750	6681	1335	2930	2543	3003	2666	1804	3163	1902	1327	1176	2376	882	828	198	183	116	108	141	131	119	168	123	1174	376	446	148	110	1079	782	55	47	224	322	160	119	112	96	123	162	164	155	181
2005-12-25	240	1392	10051	9671	6104	9873	8309	1836	4445	2964	2810	3942	2574	3717	3532	2235	2148	3605	818	1323	682	520	312	415	421	373	369	500	130	1682	735	651	208	173	1121	777	157	89	667	468	149	144	117	98	204	454	498	434	493
2006-01-01	85	1721	6595	4012	4965	5244	5130	1339	2308	1569	1335	1751	1904	1333	1557	1594	1457	2141	698	713	551	471	277	405	519	385	418	465	177	1120	442	403	470	61	1425	874	171	133	826	247	190	194	166	164	66	448	507	381	453
2006-01-08	227	1910	4897	2012	3776	2668	2991	1591	1702	1332	810	1090	1340	950	1262	1565	1271	1791	801	608	629	601	348	424	549	480	415	543	189	1193	393	420	430	187	1515	1023	178	199	903	257	203	190	168	160	192	589	532	553	535
2006-01-15	118	2252	2948	1079	1744	1484	1757	1612	1301	1046	884	1011	1035	849	998	1287	1320	1051	647	567	696	718	406	543	670	513	516	573	210	1300	542	482	379	106	1802	1270	226	240	860	333	220	194	169	141	120	696	540	725	652
2006-01-22	169	2053	2060	753	1396	1032	1275	1543	1127	898	1177	1275	853	731	915	1009	1259	929	560	414	981	992	621	817	1056	756	770	717	351	1226	678	613	536	168	1880	1357	196	182	1146	459	462	290	295	220	174	950	720	955	825
2006-01-29	297	2024	1967	826	1264	967	1219	1278	824	632	795	948	705	647	778	709	926	967	599	587	1132	1216	754	961	953	985	879	1006	344	862	566	639	559	262	1727	1313	275	230	1397	496	466	304	310	304	305	1080	845	1193	926
2006-02-05	721	1874	2038	1020	1371	1068	1412	1098	706	587	670	797	749	590	825	583	818	1169	700	684	1007	1154	880	760	980	1072	914	1423	484	703	751	837	716	617	1764	1385	415	381	1275	706	675	509	498	479	828	1169	916	1185	1061
2006-02-12	1193	2394	1674	985	1064	938	1426	933	576	506	778	804	613	494	885	577	670	1005	668	529	1434	1546	1186	700	1090	1264	1538	1573	531	611	581	640	597	716	2215	1511	519	560	1391	491	755	546	512	486	1327	1356	1501	1440	1321
2006-02-19	2305	2789	1384	863	829	738	1083	1148	782	778	888	1066	821	823	1225	827	967	1284	595	622	1143	1724	1192	688	1310	1144	1277	1568	968	720	904	1398	646	1002	2613	1578	728	836	1435	1071	1114	762	812	638	2221	1289	1371	1302	1393
2006-02-26	2289	3110	1607	968	1026	922	1077	1090	801	730	1044	1033	887	825	998	895	1032	1382	745	664	1681	2282	1468	882	1397	1469	1371	1786	1085	684	1033	1278	557	1313	2949	1991	695	945	2201	1174	1141	677	715	690	2348	1984	1618	1758	2286
2006-03-05	2896	2585	1721	969	866	998	1097	720	536	541	638	690	609	519	569	671	680	946	861	800	1893	2081	1322	812	1109	1028	1193	1566	1257	433	1208	1770	565	2594	2315	1687	602	811	2407	1669	1490	703	807	618	3255	2316	1404	1906	2076
2006-03-12	1753	2421	1461	799	787	928	1032	768	541	600	641	679	595	543	796	657	727	862	828	615	1216	1634	1037	716	742	712	687	1073	971	488	672	1196	437	1953	2120	1604	544	661	1868	1101	1392	616	693	492	1878	1933	931	1397	1622
2006-03-19	1290	1167	1238	563	691	776	867	962	584	676	832	873	636	601	857	830	827	947	604	480	1370	1691	1090	819	699	733	667	1095	885	525	578	848	403	1616	940	814	520	434	1866	923	1239	534	654	417	1453	1837	961	1440	1597
2006-03-26	599	1661	1065	518	598	767	762	1204	833	983	923	1140	893	711	955	990	1188	1068	472	308	1152	1314	849	594	601	665	531	894	619	691	504	638	322	916	1321	1097	540	510	1420	853	847	387	514	311	669	1449	755	1107	1252
2006-04-02	393	792	561	329	340	387	426	856	632	740	525	740	681	545	685	690	839	865	241	133	822	960	604	458	498	458	366	602	533	502	287	362	282	562	617	507	355	405	1113	471	711	355	456	281	455	1025	529	796	920
2006-04-09	244	1096	521	330	298	366	394	766	499	559	349	476	517	495	561	522	577	709	232	111	508	556	350	300	311	269	214	369	173	421	268	352	98	350	862	682	331	324	717	455	223	119	158	89	287	605	300	456	592
2006-04-16	336	586	456	291	239	380	394	872	634	720	484	532	598	485	585	544	686	887	177	93	353	430	273	202	265	221	172	279	67	527	114	153	42	494	478	377	310	272	558	211	88	49	63	37	382	452	230	361	451
2006-04-23	131	661	600	354	346	492	557	519	336	394	251	313	325	227	295	309	352	456	235	129	222	290	181	129	163	147	116	186	77	304	161	169	49	174	549	475	86	80	369	218	96	54	74	44	147	308	153	234	288
2006-04-30	174	842	626	357	372	551	621	566	407	425	320	371	377	272	396	336	387	516	244	143	136	157	97	82	90	82	68	103	28	346	87	108	18	246	710	610	123	126	207	128	36	21	28	18	201	160	84	128	156
2006-05-07	122	482	502	283	325	388	535	584	407	437	327	384	385	357	380	314	396	488	176	145	95	100	63	62	57	55	47	68	100	358	32	47	68	163	411	342	39	49	141	50	129	78	102	66	132	105	57	85	97
2006-05-14	18	481	314	207	208	249	340	458	324	351	224	313	326	292	262	245	330	374	108	97	140	134	83	97	79	78	70	95	20	284	10	14	14	23	440	351	33	55	199	14	25	15	20	14	19	142	78	109	132
2006-05-21	110	654	194	125	151	163	199	410	276	318	218	243	272	239	241	228	312	320	64	60	235	232	131	147	127	127	120	151	5	252	51	76	4	137	591	469	7	10	319	63	7	4	5	4	109	226	134	173	207
2006-05-28	0	364	119	80	98	92	115	396	280	298	252	221	265	241	250	242	303	293	39	28	166	160	92	105	93	95	80	113	20	252	31	44	14	0	332	266	13	19	227	39	26	15	21	15	0	154	102	119	144
2006-06-04	20	339	154	92	121	111	134	355	248	252	202	197	222	190	241	203	259	254	47	31	35	34	19	23	20	20	19	23	0	223	15	26	0	24	313	244	0	0	47	22	0	0	0	0	21	32	22	25	29
2006-06-11	0	51	43	25	33	29	36	134	91	94	71	80	84	77	81	74	103	93	13	8	150	152	88	113	103	92	95	106	6	81	0	0	5	0	47	37	18	24	211	0	9	5	7	5	0	142	95	116	136
2006-06-18	0	79	0	0	0	0	0	135	89	95	65	83	87	75	74	72	104	88	0	0	32	30	18	21	22	18	19	22	0	81	0	0	0	0	74	56	8	9	45	0	0	0	0	0	0	31	19	24	29
2006-06-25	0	60	33	17	24	22	25	80	54	56	41	52	50	42	43	40	60	54	10	5	48	46	29	31	33	29	29	41	0	46	49	66	0	0	56	45	0	0	71	53	0	0	0	0	0	48	31	39	45
2006-07-02	0	27	37	20	27	26	26	37	25	28	20	21	22	20	22	19	27	25	10	7	83	70	46	44	50	42	43	66	0	21	0	0	0	0	27	22	0	0	107	0	0	0	0	0	0	71	46	64	66
2006-07-09	0	0	0	0	0	0	0	22	15	16	12	14	14	12	13	12	16	16	0	0	112	77	54	50	60	47	50	71	0	13	0	0	0	0	0	0	0	0	127	0	0	0	0	0	0	81	51	75	75
2006-07-16	0	0	0	0	0	0	0	36	24	28	20	21	24	21	22	19	25	25	0	0	221	155	112	111	121	97	116	139	0	21	0	0	0	0	0	0	0	0	263	0	0	0	0	0	0	169	105	163	153
2006-07-23	0	29	0	0	0	0	0	110	75	84	56	56	80	72	60	64	77	79	0	0	270	199	143	189	155	124	166	180	5	65	0	0	4	0	30	24	0	0	349	0	7	5	6	4	0	218	143	210	195
2006-07-30	0	0	0	0	0	0	0	62	42	50	32	34	44	41	36	36	43	48	0	0	263	215	153	216	160	126	183	175	0	38	0	0	0	0	0	0	0	0	363	0	0	0	0	0	0	219	141	213	201
2006-08-06	15	43	0	0	0	0	0	0	0	0	0	0	0	0	0	0	0	0	0	0	221	148	111	151	112	87	128	127	0	0	0	0	0	16	45	37	0	0	244	0	0	0	0	0	17	154	97	150	140
2006-08-13	0	0	0	0	0	0	0	90	61	68	45	45	63	52	54	49	60	71	0	0	162	105	83	102	79	66	90	93	0	57	18	26	0	0	0	0	0	0	180	21	0	0	0	0	0	109	76	110	101
2006-08-20	0	23	0	0	0	0	0	59	40	52	33	39	42	38	46	33	40	53	0	0	202	122	97	110	92	87	120	113	0	39	0	0	0	0	23	21	0	0	225	0	0	0	0	0	0	129	86	128	117
2006-08-27	0	0	0	0	0	0	0	75	52	64	47	57	54	51	55	40	53	70	0	0	250	158	133	139	128	127	156	159	0	51	0	0	0	0	0	0	0	0	307	0	0	0	0	0	0	167	118	171	153
2006-09-03	0	0	33	24	29	30	27	96	66	92	78	85	75	91	82	53	73	90	9	11	181	121	99	103	91	100	131	114	0	64	0	0	0	0	0	0	0	0	232	0	0	0	0	0	0	120	85	124	109
2006-09-10	0	0	0	0	0	0	0	215	146	195	194	183	176	224	182	123	165	209	0	0	349	237	191	177	166	198	311	197	0	140	0	0	0	0	0	0	0	0	491	0	0	0	0	0	0	215	152	219	191
2006-09-17	272	26	0	0	0	0	0	180	135	172	187	156	147	190	169	106	135	184	0	0	189	138	104	106	89	115	149	111	0	117	0	0	0	253	23	23	0	0	292	0	0	0	0	0	272	119	81	123	109
2006-09-24	0	0	0	0	0	0	0	206	145	203	203	182	168	193	206	119	163	207	0	0	265	222	179	162	133	177	200	177	0	143	0	0	0	0	0	0	11	10	425	0	0	0	0	0	0	175	140	170	155
2006-10-01	0	37	0	0	0	0	0	175	128	169	156	162	161	153	204	103	156	195	0	0	132	117	83	82	64	86	96	94	4	121	0	0	4	0	32	36	20	18	202	0	7	5	5	5	0	86	71	79	77
2006-10-08	81	45	0	0	0	0	0	197	153	193	185	225	198	192	217	136	202	223	0	0	156	124	89	81	71	87	107	95	0	149	17	17	0	78	45	50	0	0	207	13	0	0	0	0	66	95	88	82	79
2006-10-15	101	56	0	0	0	0	0	202	162	224	194	245	214	215	219	171	194	258	0	0	172	154	101	94	105	98	135	107	4	167	0	0	4	86	59	70	15	16	216	0	6	4	4	4	76	108	100	95	98
2006-10-22	23	107	11	17	11	14	18	158	125	154	147	174	192	160	153	133	151	214	4	8	203	159	112	107	140	110	149	126	6	113	14	17	7	21	120	135	0	0	231	14	11	7	6	6	20	133	119	127	122
2006-10-29	109	148	48	78	56	65	73	105	90	102	106	110	129	124	99	94	108	136	16	35	369	279	201	212	265	206	267	234	18	69	0	0	21	86	189	167	0	0	430	0	32	19	16	17	88	269	236	245	223
2006-11-05	49	123	47	68	50	60	63	185	174	178	164	179	223	191	172	180	185	228	15	34	398	306	209	242	252	221	336	273	6	132	35	38	7	44	177	141	14	12	506	33	11	7	5	6	39	280	299	310	264
2006-11-12	111	55	161	164	151	183	183	39	41	39	39	49	45	37	48	40	43	49	44	78	374	328	196	220	319	246	326	281	11	34	13	16	15	112	84	66	8	7	513	14	22	13	11	13	111	279	294	351	257
2006-11-19	22	175	83	77	68	91	93	58	64	59	61	89	63	51	83	61	66	69	23	34	331	297	191	175	352	237	273	325	43	54	82	103	58	26	248	183	23	21	449	90	89	57	45	57	22	270	269	331	260
2006-11-26	514	126	209	186	157	210	235	90	102	93	80	126	89	75	92	98	111	95	54	68	367	332	181	162	259	218	260	288	53	81	110	102	65	488	158	129	11	11	380	86	100	70	52	69	458	250	223	300	254
2006-12-03	471	269	289	204	173	207	212	118	141	124	122	146	127	137	127	127	136	109	61	68	456	391	266	252	320	330	381	442	38	108	116	138	41	338	278	283	38	34	590	115	68	49	34	41	402	394	336	414	373
2006-12-10	1172	643	387	231	259	254	274	151	161	170	159	176	207	191	177	179	188	136	82	94	663	548	413	369	483	491	730	742	156	156	347	356	150	605	613	689	56	52	846	351	268	190	147	146	800	538	1198	532	589
2006-12-17	3388	831	567	410	445	377	409	105	106	112	105	146	143	115	124	138	126	95	141	140	694	604	435	498	564	604	891	1064	206	108	731	778	208	1051	1031	998	129	136	823	705	358	313	245	250	2198	661	1747	665	713
2006-12-24	3094	887	866	792	789	599	647	232	235	245	309	370	352	257	336	317	299	229	222	250	651	541	407	427	475	592	832	973	379	251	942	828	390	1361	1473	1002	83	73	661	736	746	586	453	621	2480	650	1241	562	703
2006-12-31	1605	862	702	716	721	529	526	181	169	194	229	270	273	236	316	272	201	216	174	193	352	267	245	206	249	316	333	459	175	220	574	561	193	1120	1581	975	86	80	375	558	333	257	207	313	1365	370	417	333	438
2007-01-07	1150	1025	1108	986	1145	834	851	322	320	378	433	459	542	385	470	499	370	448	283	270	311	264	218	179	230	232	265	351	295	364	964	868	311	1037	1514	1024	133	139	390	1080	567	416	374	422	1187	351	301	322	385
2007-01-14	647	1531	745	634	794	582	608	554	486	647	654	781	762	583	700	732	654	848	208	173	337	293	224	160	241	205	244	341	467	603	1046	761	474	763	1817	1284	114	117	377	976	886	573	632	566	740	345	254	327	385
2007-01-21	970	2636	1383	1319	1461	1271	1040	918	789	1012	1201	1224	1284	1115	1191	1101	1117	1216	395	332	680	641	458	292	403	357	527	584	728	925	1178	1043	638	1685	2307	1804	131	151	732	1260	1093	683	777	640	1205	726	502	680	738
2007-01-28	1257	4514	1339	1220	1473	1462	1223	1315	993	1346	1258	1645	1675	1407	1741	1524	1637	1375	399	443	974	1006	587	384	574	488	792	761	1141	1188	1418	1702	806	2148	2580	2187	173	206	1006	1832	1647	830	980	712	1662	924	830	1005	907
2007-02-04	1647	9932	1434	1194	1434	1519	1337	2939	1329	2051	1818	2796	2232	1897	2485	2435	2460	2095	441	498	1201	1341	615	445	658	576	985	919	1504	2662	1967	2094	1227	2420	3874	3160	444	394	1171	1978	3222	957	1188	785	2610	1314	934	1617	1214
2007-02-11	1597	7724	1489	1330	1441	1183	1314	2768	1049	1908	1681	2192	1938	1259	2070	2120	1897	1719	488	521	973	1335	650	492	696	621	1142	1120	1817	2615	1590	1566	1597	2032	3012	2560	462	475	1171	1360	4231	1207	1421	854	2634	1523	969	1742	1362
2007-02-18	1440	6540	1565	1178	1428	1173	1268	2199	943	1490	1213	1632	1809	954	1578	1550	1481	1433	723	604	1004	1238	620	471	643	655	891	1143	1405	1992	1764	1838	1369	2031	2819	2638	472	487	980	1537	3067	978	1317	818	2352	2252	959	1715	1359
2007-02-25	1326	4906	1701	1138	1728	1397	1659	1599	800	1278	1065	1269	1400	744	984	1137	1071	1212	909	698	1077	1337	679	549	684	725	950	1194	1028	1527	1474	1879	897	2290	2488	2659	613	598	1168	1665	1841	858	1078	685	1979	2392	1018	1655	1412
2007-03-04	1815	3658	1429	934	1409	1387	1317	1349	762	1147	861	1078	1174	680	947	992	921	1199	805	698	825	905	577	388	533	528	667	916	639	1153	1346	1679	545	3370	2045	2092	494	594	1030	1477	1023	569	700	460	2372	1650	678	1124	1135
2007-03-11	1460	2159	1407	890	1347	1231	1186	1317	835	1164	783	890	1080	835	949	936	889	1241	749	747	881	974	690	424	549	567	700	996	588	1123	1230	1250	486	2332	1380	1450	462	558	1253	1399	870	546	709	424	1714	1597	693	1056	1104
2007-03-18	992	1338	1228	703	1121	898	881	799	579	731	450	560	647	518	574	632	530	762	577	471	878	849	634	445	527	543	530	854	476	775	841	1184	401	1634	975	897	353	423	1101	1066	738	451	600	337	1160	1342	620	853	944
2007-03-25	518	561	961	529	918	683	680	819	650	752	494	618	576	461	542	620	551	787	447	284	525	471	369	352	321	337	296	471	286	750	467	730	237	772	442	379	323	379	689	675	408	266	359	209	572	695	332	459	501
2007-04-01	329	371	462	256	422	284	337	627	499	624	386	500	448	346	370	473	424	568	209	133	501	503	380	348	308	321	294	461	157	544	168	237	132	453	320	273	277	316	767	261	235	150	197	111	378	691	353	478	500
2007-04-08	121	445	393	211	358	234	270	632	520	648	378	521	442	373	368	473	443	592	160	116	634	657	512	429	455	410	457	582	96	501	183	213	74	153	400	337	224	237	992	247	153	95	118	71	133	855	419	591	648
2007-04-15	44	203	292	158	270	172	214	392	353	425	244	318	268	238	239	302	298	345	122	87	695	623	476	359	446	351	466	539	46	310	96	88	37	56	183	152	273	245	993	117	77	46	59	36	49	757	400	561	617
2007-04-22	0	213	212	131	209	122	175	634	572	646	356	510	409	388	282	447	451	532	86	64	601	523	407	301	391	280	399	446	27	482	142	140	23	0	198	158	198	206	785	166	46	27	34	21	0	606	347	466	503
2007-04-29	60	128	136	82	130	72	114	534	455	506	299	410	366	328	219	349	364	446	54	37	255	242	182	143	162	130	175	194	21	379	114	128	17	68	130	96	143	144	361	144	34	21	25	16	66	260	152	199	220
2007-05-06	25	127	189	106	172	98	146	343	278	330	196	235	221	219	142	233	241	289	72	45	206	202	147	124	133	117	134	164	0	242	38	46	0	26	125	96	27	26	294	48	0	0	0	0	27	215	126	166	179
2007-05-13	0	32	208	120	191	107	163	209	179	203	120	152	144	146	92	147	159	190	79	53	118	119	87	77	73	73	81	103	36	148	0	0	32	0	31	24	84	90	172	0	60	38	46	30	0	121	74	99	105
2007-05-20	0	45	189	108	177	102	143	306	259	289	160	208	215	200	142	214	218	314	70	49	188	188	130	113	107	113	125	166	5	209	0	0	4	0	43	36	12	14	267	0	8	5	6	4	0	184	111	156	160
2007-05-27	0	132	34	19	31	20	25	139	120	128	83	94	101	79	63	99	101	138	12	9	46	46	31	28	26	28	31	38	12	98	0	0	10	0	131	110	6	7	63	0	19	13	16	10	0	42	27	35	38
2007-06-03	0	41	20	11	19	12	14	57	46	50	33	41	43	31	24	41	41	59	7	5	18	17	12	11	10	11	12	14	16	37	26	39	13	0	42	34	6	7	24	30	24	17	20	14	0	16	10	13	14
2007-06-10	0	20	53	28	47	31	34	125	100	109	71	94	93	66	48	90	86	122	18	13	76	69	48	41	41	48	47	60	4	79	0	0	4	0	20	17	0	0	97	0	6	5	6	4	0	62	42	55	58
2007-06-17	0	0	0	0	0	0	0	58	47	51	35	44	43	30	24	42	40	56	0	0	0	0	0	0	0	0	0	0	0	37	0	0	0	0	0	0	0	0	0	0	0	0	0	0	0	0	0	0	0
2007-06-24	0	45	0	0	0	0	0	61	48	53	34	51	47	33	29	44	42	58	0	0	42	38	27	25	26	27	25	34	0	39	0	0	0	0	46	39	0	0	56	0	0	0	0	0	0	34	23	30	32
2007-07-01	0	0	0	0	0	0	0	115	89	98	64	93	89	71	56	82	78	104	0	0	53	51	36	41	36	38	37	46	0	74	0	0	0	0	0	0	0	0	77	0	0	0	0	0	0	46	30	41	43
2007-07-08	0	48	0	0	0	0	0	134	97	110	75	116	107	87	72	91	88	115	0	0	52	48	35	38	32	38	34	43	0	81	0	0	0	0	50	45	0	0	74	0	0	0	0	0	0	42	28	39	40
2007-07-15	0	23	91	57	79	66	64	115	82	96	69	100	85	76	66	85	76	101	30	22	24	22	16	17	15	17	16	20	0	68	0	0	0	0	24	21	0	0	36	0	0	0	0	0	0	19	13	19	18
2007-07-22	0	0	49	31	41	35	33	241	168	197	138	201	180	170	142	176	157	200	17	12	72	63	44	50	44	49	49	58	0	142	0	0	0	0	0	0	0	0	112	0	0	0	0	0	0	56	39	54	53
2007-07-29	0	0	0	0	0	0	0	142	105	122	90	121	103	94	85	105	96	116	0	0	38	34	23	24	23	25	26	28	0	84	21	25	0	0	0	0	0	0	59	20	0	0	0	0	0	28	20	26	27
2007-08-05	0	113	63	41	52	43	42	218	171	195	161	203	157	149	117	161	162	176	21	20	45	39	26	29	27	28	32	34	0	137	0	0	0	0	115	105	0	0	66	0	0	0	0	0	0	33	23	31	30
2007-08-12	0	44	0	0	0	0	0	92	72	86	78	83	65	68	44	64	67	74	0	0	45	35	24	30	26	27	32	31	0	53	0	0	0	0	47	40	12	15	62	0	0	0	0	0	0	31	22	30	28
2007-08-19	0	53	0	0	0	0	0	114	88	104	100	101	82	79	55	76	81	90	0	0	68	50	35	44	40	38	43	44	0	66	0	0	0	0	58	48	0	0	89	0	0	0	0	0	0	44	32	42	39
2007-08-26	0	24	0	0	0	0	0	165	131	156	132	160	121	123	91	111	121	139	0	0	73	52	38	49	45	40	43	47	0	98	0	0	0	0	26	22	0	0	88	0	0	0	0	0	0	47	34	44	40
2007-09-02	0	25	0	0	0	0	0	182	154	180	150	165	133	145	113	120	143	161	0	0	49	33	24	30	31	26	25	32	5	115	0	0	6	0	28	23	0	0	54	0	8	6	6	6	0	31	22	27	25
2007-09-09	0	0	0	0	0	0	0	171	133	174	160	154	125	130	99	110	134	152	0	0	43	29	19	25	27	22	24	26	0	105	0	0	0	0	0	0	0	0	45	0	0	0	0	0	0	25	18	23	19
2007-09-16	0	23	31	28	24	28	42	176	134	169	171	157	124	134	105	114	127	156	14	15	143	105	60	82	85	73	89	82	6	102	0	0	9	0	28	20	10	10	146	0	10	7	7	9	0	80	56	82	61
2007-09-23	0	48	0	0	0	0	0	112	76	98	98	97	75	82	69	66	79	86	0	0	153	124	73	89	90	87	105	86	0	55	0	0	0	0	56	42	0	0	184	0	0	0	0	0	0	101	74	101	68
2007-09-30	0	18	16	15	12	18	20	190	134	158	176	167	122	145	129	99	133	156	8	7	84	76	43	48	49	48	60	53	3	92	21	20	5	0	24	15	0	0	109	15	5	4	4	6	0	56	53	51	37
2007-10-07	0	85	78	72	62	92	96	117	95	100	116	122	85	110	80	69	95	107	39	38	63	56	30	34	34	36	41	36	7	61	0	0	10	0	112	74	0	0	87	0	11	8	7	12	0	38	38	38	26
2007-10-14	0	61	15	14	12	17	18	108	83	94	110	119	80	95	66	62	89	99	8	8	100	94	54	56	58	66	65	65	6	68	0	0	8	0	84	54	17	16	144	0	9	7	6	9	0	66	63	64	45
2007-10-21	0	67	14	13	10	14	16	138	105	114	116	143	102	98	94	79	112	129	6	8	101	83	51	56	56	67	69	60	6	91	0	0	8	0	92	63	9	9	126	0	9	7	6	10	0	61	54	62	44
2007-10-28	20	120	42	40	31	48	48	117	92	108	86	132	101	81	83	69	97	121	19	22	171	136	85	84	98	106	121	111	3	79	18	19	3	18	161	113	0	0	184	17	4	3	3	4	17	102	85	112	82
2007-11-04	37	174	97	100	64	101	111	214	175	196	164	220	193	176	142	124	168	226	38	44	117	94	56	54	69	65	80	80	6	144	0	0	5	37	246	156	18	17	117	0	8	6	4	8	37	70	64	77	54
2007-11-11	51	169	110	112	74	130	121	149	129	149	114	151	133	133	85	89	113	152	42	58	110	89	59	49	74	68	78	80	14	106	54	52	12	53	207	164	6	6	130	44	23	14	10	17	53	75	71	95	64
2007-11-18	0	368	517	483	379	630	593	80	73	89	60	79	75	70	42	48	63	82	202	262	163	134	87	72	108	98	107	113	10	58	49	54	10	0	401	346	0	0	188	50	17	11	10	11	0	126	109	142	97
2007-11-25	0	331	503	496	401	561	578	123	116	153	110	129	103	108	92	76	111	120	208	238	173	126	82	79	95	89	133	112	28	97	101	102	28	0	321	290	16	17	196	90	54	30	31	33	0	119	104	138	101
2007-12-02	25	488	259	252	229	257	260	179	164	220	132	196	144	149	116	116	173	190	106	106	138	112	67	67	70	70	97	92	13	140	91	104	13	26	444	382	32	32	175	89	22	13	14	15	24	108	87	110	84
2007-12-09	0	450	511	480	456	461	528	239	207	255	162	247	195	206	132	134	227	230	233	226	49	37	23	24	27	25	30	34	40	167	189	247	41	0	388	351	49	62	61	221	65	43	40	44	0	39	33	38	30
2007-12-16	34	610	556	511	483	484	537	273	245	286	196	296	232	299	145	164	309	285	264	305	124	87	59	56	65	67	77	82	42	187	359	398	47	44	530	481	61	72	148	404	67	47	44	44	41	104	73	85	73
2007-12-23	128	612	888	962	887	848	897	338	264	357	275	374	257	375	176	191	372	343	442	581	401	214	155	148	190	129	235	243	62	228	398	333	64	176	540	539	59	69	409	361	103	65	65	63	165	270	183	224	197
2007-12-30	38	940	801	882	963	832	856	514	414	560	611	603	486	712	373	333	643	597	440	559	393	221	155	156	193	125	223	218	97	361	696	489	112	50	960	840	68	72	429	542	174	104	107	112	48	274	173	221	182
2008-01-06	180	1436	950	1024	1290	1346	1350	735	621	890	821	987	773	966	571	546	1003	964	554	523	558	364	237	233	273	272	351	334	178	596	1144	977	214	230	1769	1516	199	203	588	1073	350	194	198	241	237	460	273	349	284
2008-01-13	232	1941	961	976	1322	1216	1423	887	829	1271	1016	1374	1145	1116	534	724	1224	1149	583	543	760	579	385	338	386	424	479	485	255	720	823	747	312	272	2686	2114	217	195	909	904	498	284	284	377	333	638	405	510	419
2008-01-20	1169	2571	1334	1608	2135	1593	2081	1154	1154	1702	1712	1875	1262	1819	767	895	1417	1611	735	867	1527	1162	658	558	713	694	1057	792	466	910	1978	1360	631	1023	4272	3136	295	250	1850	2336	816	481	474	1220	1274	950	807	1004	734
2008-01-27	3229	8548	1948	2665	2719	2402	3980	1477	2048	2070	2231	2632	1733	1978	887	1349	1598	1985	1023	1336	2694	1857	902	839	1120	1109	2103	1539	686	1098	3224	3252	892	2515	6731	6262	778	840	3374	4200	1115	751	686	2274	2990	1570	2072	2258	1248
2008-02-03	9375	12266	2767	4053	3996	3927	6312	2438	3158	2303	2850	3464	2245	2449	1188	466	1999	2631	1925	1912	3999	2671	1511	1202	2214	1589	3939	3829	1243	1324	3702	5464	1510	6541	9239	8199	1587	1902	5620	4996	1684	1902	1617	3611	7146	3336	5099	4868	3377
2008-02-10	12840	11269	3402	4303	5264	4553	6708	3650	4127	2728	2820	4388	3390	2982	1344	2954	3178	3175	2125	1984	4204	3137	1882	1224	2509	1920	4917	5711	2137	2201	3686	5833	2981	7664	7609	6805	2333	2803	5155	4217	2985	3453	3013	3212	7530	7821	5546	6722	5849
2008-02-17	12188	8871	3947	4164	5327	3836	6376	4282	4144	3235	3120	4535	4275	3253	1605	4014	4204	3657	2525	2314	4319	3344	2472	1487	2939	2644	5126	5705	2884	3473	4643	7159	4193	8905	5545	4897	3029	2880	5319	4343	4662	3533	3992	3048	7049	9470	6475	8515	7930
2008-02-24	6975	6706	3777	3042	4217	3600	4412	3326	2557	2688	2029	3358	2627	2108	1201	3745	2973	2635	2599	1729	3494	2790	2862	1125	2255	2000	3518	4317	3725	2899	5412	6612	3475	6925	4506	4007	2099	2012	4075	4112	5479	3800	4212	2085	5154	9191	4277	6894	6249
2008-03-02	5156	4254	2638	1922	2781	2393	2523	2988	1892	2289	2078	2303	2156	1662	1200	2834	2462	2387	1492	991	2418	2106	2476	1039	1837	1702	2215	2997	2507	2472	3635	3272	2034	6164	2872	2460	1519	1653	2796	2669	3989	2475	2605	1281	3833	5045	2656	3956	3820
2008-03-09	3296	2386	1975	1419	1962	1559	1510	2332	1227	1645	1149	1507	1446	1131	948	2385	1656	1652	1025	647	1592	1548	1845	783	1264	1196	1253	1780	2530	1831	3265	2677	1905	3484	1686	1487	926	1105	1857	2343	3601	2231	2632	1366	2516	2734	1633	2566	2427
2008-03-16	1703	1597	1502	978	1522	1118	1097	2026	1133	1437	850	1230	1343	1023	560	2265	1455	1503	732	418	1286	1262	1345	657	984	983	878	1320	1889	1530	3401	2840	1448	1773	1206	1041	839	758	1485	2512	2531	1545	1995	951	1362	1895	1045	1754	1723
2008-03-23	783	895	1032	730	1041	751	731	1689	889	1111	571	1003	1081	824	394	2002	1167	1232	474	239	1052	974	1014	595	711	698	734	920	1274	1304	1607	1387	932	903	693	579	699	688	1211	1408	1799	990	1426	664	700	1509	745	1370	1275
2008-03-30	410	560	825	563	826	584	631	1326	725	908	506	851	895	649	326	1540	1007	1011	347	193	683	622	650	368	468	499	389	560	890	1027	742	591	652	479	441	398	534	565	840	716	1261	679	1004	462	383	891	428	793	778
2008-04-06	396	459	609	379	630	434	484	832	460	558	308	595	545	432	210	1247	678	636	248	135	394	370	360	207	260	285	202	304	584	625	596	467	438	484	388	320	353	405	507	571	841	465	669	328	378	496	241	423	423
2008-04-13	351	257	656	364	678	461	486	648	414	459	248	478	423	354	226	739	526	529	251	150	353	353	314	213	227	268	185	286	296	502	236	273	211	455	222	185	154	177	484	348	401	216	325	162	360	455	217	374	396
2008-04-20	54	104	106	56	110	72	78	517	342	387	246	407	324	271	304	434	430	420	38	22	210	192	170	118	129	144	106	163	148	385	208	215	108	65	89	76	120	133	275	306	200	112	171	89	57	245	119	210	212
2008-04-27	0	237	187	98	186	130	138	318	220	237	149	228	186	169	166	230	252	247	65	46	223	208	181	132	142	159	132	177	123	225	86	81	95	0	219	191	49	59	304	106	169	97	143	78	0	266	129	233	222
2008-05-04	0	139	118	65	123	81	88	328	227	248	162	237	193	162	156	218	256	256	41	26	46	41	34	23	26	27	25	32	25	225	35	34	19	0	130	110	30	33	57	43	34	20	30	16	0	48	24	42	41
2008-05-11	0	71	131	74	133	93	92	111	75	80	59	80	67	55	51	69	85	91	47	27	81	66	52	43	42	44	38	53	17	76	0	0	12	0	69	58	15	17	93	0	22	13	19	11	0	76	41	69	68
2008-05-18	24	50	126	67	126	88	90	93	65	69	51	65	58	43	44	60	69	76	45	27	44	38	30	26	24	24	20	31	13	64	22	23	9	28	48	41	0	0	53	25	17	10	15	8	26	41	23	39	37
2008-05-25	0	79	0	0	0	0	0	74	52	58	35	49	44	34	35	49	53	57	0	0	46	38	31	27	26	25	19	31	7	50	15	18	5	0	73	62	0	0	53	17	9	5	7	4	0	39	23	39	36
2008-06-01	0	23	0	0	0	0	0	44	33	37	19	31	27	22	21	29	31	34	0	0	67	53	41	36	38	35	26	47	6	30	0	0	4	0	21	18	20	22	74	0	8	5	7	4	0	53	31	53	51
2008-06-08	0	0	0	0	0	0	0	53	39	45	25	37	31	28	29	33	38	39	0	0	89	79	59	48	52	50	38	67	0	37	0	0	0	0	0	0	0	0	104	0	0	0	0	0	0	72	43	77	72
2008-06-15	0	0	0	0	0	0	0	31	22	27	17	22	18	17	21	18	21	25	0	0	41	36	27	24	24	23	17	31	0	22	0	0	0	0	0	0	0	0	48	0	0	0	0	0	0	33	20	35	32
2008-06-22	0	0	0	0	0	0	0	66	45	56	33	46	39	36	41	36	44	52	0	0	0	0	0	0	0	0	0	0	0	46	0	0	0	0	0	0	0	0	0	0	0	0	0	0	0	0	0	0	0
2008-06-29	0	0	0	0	0	0	0	25	18	22	13	18	15	15	16	14	17	21	0	0	23	18	14	12	11	11	9	15	0	18	0	0	0	0	0	0	0	0	26	0	0	0	0	0	0	17	10	18	16
2008-07-06	0	0	0	0	0	0	0	36	25	31	18	26	21	21	21	20	23	28	0	0	12	9	7	6	6	6	4	7	5	24	20	19	4	0	0	0	0	0	13	17	8	5	7	4	0	8	5	8	8
2008-07-13	0	28	0	0	0	0	0	13	9	11	8	9	8	7	7	7	8	10	0	0	20	16	12	11	11	11	8	13	0	8	0	0	0	0	27	24	0	0	23	0	0	0	0	0	0	14	8	14	13
2008-07-20	0	23	0	0	0	0	0	72	51	63	42	55	44	41	42	38	46	55	0	0	9	7	5	6	5	6	4	6	0	47	0	0	0	0	22	20	0	0	11	0	0	0	0	0	0	6	4	6	6
2008-07-27	18	0	0	0	0	0	0	0	0	0	0	0	0	0	0	0	0	0	0	0	43	34	23	23	22	25	16	24	0	0	36	42	0	20	0	0	0	0	47	33	0	0	0	0	20	27	17	26	26
2008-08-03	16	19	0	0	0	0	0	11	8	9	6	8	7	7	6	6	7	8	0	0	35	26	18	18	17	19	12	19	6	7	0	0	5	18	18	16	0	0	38	0	9	5	7	5	18	20	14	20	20
2008-08-10	0	0	0	0	0	0	0	11	8	10	7	8	7	8	8	7	7	8	0	0	0	0	0	0	0	0	0	0	0	7	0	0	0	0	0	0	0	0	0	0	0	0	0	0	0	0	0	0	0
2008-08-17	15	35	0	0	0	0	0	28	21	27	20	22	18	22	21	19	18	22	0	0	0	0	0	0	0	0	0	0	0	18	0	0	0	16	33	32	0	0	0	0	0	0	0	0	17	0	0	0	0
2008-08-24	11	0	0	0	0	0	0	0	0	0	0	0	0	0	0	0	0	0	0	0	35	21	15	15	14	14	14	15	0	0	16	17	0	13	0	0	0	0	32	14	0	0	0	0	13	16	12	17	15
2008-08-31	0	16	0	0	0	0	0	0	0	0	0	0	0	0	0	0	0	0	0	0	46	28	20	23	19	19	19	20	0	0	0	0	0	0	15	15	0	0	44	0	0	0	0	0	0	21	17	23	20
2008-09-07	0	12	0	0	0	0	0	41	36	40	41	32	30	41	36	33	28	31	0	0	36	25	15	21	16	15	15	16	0	27	0	0	0	0	12	11	0	0	40	0	0	0	0	0	0	16	13	19	16
2008-09-14	13	23	0	0	0	0	0	47	39	44	47	34	33	49	46	39	34	37	0	0	36	27	17	25	16	17	17	17	0	28	0	0	0	15	22	21	0	0	44	0	0	0	0	0	12	18	15	21	16
2008-09-21	0	30	0	0	0	0	0	23	18	18	24	14	16	21	23	16	15	17	0	0	39	28	18	24	18	17	18	18	0	11	0	0	0	0	30	29	0	0	50	0	0	0	0	0	0	18	17	20	17
2008-09-28	0	24	23	29	27	30	41	45	37	37	41	28	33	42	48	32	31	45	9	12	25	17	11	15	11	10	11	10	0	22	0	0	0	0	25	26	0	0	30	0	0	0	0	0	0	11	10	12	10
2008-10-05	0	31	67	90	79	89	112	54	37	41	29	29	36	42	53	34	37	55	29	37	7	5	3	3	3	2	3	3	8	22	0	0	10	0	30	36	0	0	8	0	12	7	9	12	0	3	3	3	3
2008-10-12	0	53	35	47	41	47	58	158	104	121	64	76	115	109	162	89	109	141	15	24	48	40	22	24	21	17	22	20	0	57	0	0	0	0	53	65	0	0	59	0	0	0	0	0	0	21	23	27	20
2008-10-19	0	91	0	0	0	0	0	201	120	136	114	84	130	126	181	105	139	171	0	0	44	41	25	23	22	16	23	21	27	63	69	73	29	0	86	99	0	0	60	69	35	20	24	31	0	24	24	29	22
2008-10-26	22	73	19	28	22	31	37	151	101	107	112	64	110	103	137	90	111	131	10	13	70	60	35	30	33	23	37	31	0	50	0	0	0	21	71	84	7	4	83	0	0	0	0	0	10	39	40	42	35
2008-11-02	0	99	24	38	27	40	54	287	183	200	194	114	223	201	249	167	229	221	13	18	51	45	27	23	25	19	30	24	14	95	120	146	10	0	93	110	6	4	60	104	16	9	9	13	0	39	34	36	30
2008-11-09	0	139	8	13	10	16	17	188	137	136	139	80	151	169	207	138	159	162	5	7	68	58	33	28	33	33	42	31	0	73	0	0	0	0	152	150	0	0	79	0	0	0	0	0	0	54	43	53	40
2008-11-16	0	165	47	80	55	80	93	191	156	159	141	91	162	207	203	158	170	194	31	38	109	107	58	52	67	59	77	66	0	89	81	80	0	0	202	174	0	0	147	74	0	0	0	0	0	100	80	96	73
2008-11-23	0	225	63	119	73	94	109	261	208	227	185	128	202	296	193	230	244	250	37	38	77	84	45	43	54	48	66	55	0	150	54	65	0	0	252	211	41	21	114	64	0	0	0	0	0	83	65	75	60
2008-11-30	25	273	109	206	143	157	151	205	168	171	147	101	162	231	216	186	184	216	60	57	111	113	65	59	66	67	80	81	29	129	129	124	20	26	283	232	0	0	147	124	39	25	22	25	16	115	97	96	94
2008-12-07	0	449	93	146	121	127	114	218	178	187	166	108	218	237	237	204	214	212	49	50	129	136	81	67	78	84	92	105	29	173	124	149	22	0	438	366	44	24	174	127	40	25	26	23	0	146	119	113	116
2008-12-14	54	627	130	163	146	146	135	193	154	159	149	95	203	197	187	179	186	175	59	57	200	242	125	107	133	132	142	179	53	167	189	260	40	50	614	517	36	23	272	235	74	47	47	40	51	239	175	179	180
2008-12-21	27	698	215	248	246	245	216	115	87	101	94	62	112	111	118	110	113	113	99	85	158	173	96	80	106	99	107	132	88	96	256	350	70	26	661	569	62	45	203	321	136	81	87	71	27	174	131	132	125
2008-12-28	0	646	276	295	340	292	286	261	190	260	216	145	265	248	307	246	256	269	128	115	201	213	115	103	138	118	111	143	113	217	514	569	93	0	614	525	65	55	234	557	181	102	115	97	0	195	144	146	140
2009-01-04	74	836	611	598	751	623	638	291	219	309	262	171	324	326	378	284	319	301	271	306	407	394	222	219	280	216	208	292	133	221	584	599	118	83	835	694	92	76	501	596	227	119	140	126	84	383	285	285	292
2009-01-11	63	1124	604	578	721	578	607	288	213	345	194	164	273	327	296	275	311	320	266	240	471	460	261	243	292	241	221	344	203	206	671	672	182	79	1223	1084	241	212	551	711	369	183	224	220	83	440	306	363	336
2009-01-18	290	1645	1025	953	1393	1127	1140	368	268	530	178	206	332	321	436	377	396	379	451	437	680	574	363	298	352	312	227	425	313	249	748	777	293	348	1901	1838	329	326	693	749	644	282	343	348	374	495	380	486	399
2009-01-25	313	2146	1024	1023	1333	1133	1130	458	340	663	328	269	416	412	521	474	503	482	477	488	1121	924	538	502	533	452	430	592	392	290	1170	1223	383	327	3088	2491	610	514	1037	1125	869	365	425	451	384	704	558	706	563
2009-02-01	820	2454	774	875	1070	958	841	857	551	1001	632	507	802	647	1003	909	817	827	451	526	1589	1295	852	760	1022	755	715	798	559	500	1439	1568	507	688	5284	3362	909	624	1419	1348	1142	527	544	624	851	911	748	1015	804
2009-02-08	939	2808	1035	1125	1346	1187	967	1214	690	1157	781	654	1047	967	1114	1143	1071	1167	607	705	2044	1860	1486	1205	1511	1398	1241	1064	790	588	1715	1873	634	663	5605	4092	1951	1007	1951	1946	1521	825	753	1135	877	1210	1177	1647	1250
2009-02-15	1851	2284	1070	1144	1292	1178	1045	1417	711	1162	947	727	1095	1176	1267	1289	1177	1253	656	869	1968	2497	1801	1124	1487	1683	1232	1207	903	638	2356	2534	646	1132	4505	2953	2135	1021	2598	2742	1577	837	747	1007	1615	1497	1498	2064	1925
2009-02-22	2513	2468	1568	1724	1880	1562	1506	1880	969	1422	1248	1124	1363	1518	1467	1613	1444	1554	737	997	1928	2291	1665	947	1280	1400	1283	1409	1226	964	2212	2363	759	1878	4045	2874	1276	747	3010	2564	1726	993	848	1341	2878	1948	1899	2139	1993
2009-03-01	1157	2358	1611	1502	1862	1632	1500	2184	1274	1663	1315	1417	1502	1260	1636	1543	1724	1731	668	783	1744	1808	1570	841	1112	1273	1342	1690	1268	1607	2928	2856	811	1274	2987	2272	1095	831	2672	2921	1489	1102	905	1209	1511	2126	1693	1887	1762
2009-03-08	1245	2307	1561	1298	1744	1600	1388	1595	1125	1254	1036	1215	1171	966	1099	1035	1303	1192	561	601	1313	1590	1438	853	1058	1330	1166	1939	1177	1674	2205	2639	690	1661	2562	1771	728	785	2306	2620	1292	942	811	835	1666	2170	1505	1682	1615
2009-03-15	2488	1417	1549	1397	1577	1656	1319	1444	1198	1236	926	1239	1277	917	1155	876	1273	1081	581	615	1064	1177	1056	681	819	1059	841	1506	1152	2048	1525	1578	694	3451	1309	940	429	574	1728	1644	1127	750	802	597	3729	1789	1115	1340	1177
2009-03-22	1668	807	1621	1340	1631	1792	1333	1096	863	895	609	996	916	650	819	743	1001	759	689	568	749	800	679	504	547	713	562	1108	752	1545	1258	1258	429	2137	747	532	250	402	1174	1303	749	431	524	348	2523	1358	754	945	810
2009-03-29	194	526	1110	803	1082	1166	877	1017	830	848	668	1111	772	643	705	788	998	705	464	324	499	542	432	373	382	484	352	816	581	1463	809	985	337	256	514	364	218	400	776	923	611	327	438	284	332	959	499	674	540
2009-04-05	447	336	780	539	726	744	584	587	500	497	388	668	405	357	403	448	604	386	316	183	326	318	247	221	226	279	202	528	413	768	494	655	251	549	342	251	257	476	498	634	457	238	323	214	745	597	296	403	324
2009-04-12	228	131	645	462	655	612	508	457	391	388	273	561	342	289	301	336	473	321	245	154	194	185	138	118	127	144	115	307	291	590	365	457	182	268	133	101	61	127	283	448	344	191	257	161	378	331	166	230	184
2009-04-19	71	253	715	533	775	686	614	530	454	419	332	711	432	392	442	423	571	390	269	198	172	155	118	109	114	126	98	260	171	628	150	150	109	81	244	204	84	182	243	155	206	120	156	115	119	278	140	193	152
2009-04-26	539	439	2368	3410	3043	2415	3759	978	972	776	1272	1237	1322	1775	1883	1770	1078	1267	722	1164	1119	482	388	945	493	412	652	646	237	928	1270	1023	160	442	458	563	287	350	1044	738	340	227	235	311	493	684	542	541	430
2009-05-03	803	605	4892	3134	4639	4529	4203	2118	2226	1561	1895	2209	2018	2245	2449	2847	2234	3832	1297	875	935	638	603	857	758	770	553	705	211	1556	1113	1219	162	673	657	941	366	308	1262	1108	354	296	211	237	494	716	748	653	521
2009-05-10	671	1025	2170	1289	2018	2366	1624	3143	3176	2418	1509	2803	2028	2105	2287	2788	3018	3738	653	392	707	689	606	591	584	679	431	659	203	2104	943	1008	165	769	1180	1193	430	473	1041	1422	380	256	211	197	518	680	587	632	545
2009-05-17	361	1576	2600	1570	2347	3008	1972	3532	2804	2867	1669	3104	1761	1696	1900	2436	3391	3311	801	455	959	932	692	625	600	712	587	834	227	2335	1726	1392	186	454	1774	1346	904	1069	1159	1931	447	247	235	225	332	814	625	875	728
2009-05-24	627	1534	2721	1699	2507	3194	2371	3371	2264	3201	1565	3009	1645	1360	1868	2097	3435	2648	888	533	1079	1041	705	676	627	722	566	958	271	2253	2189	1625	227	797	1671	1272	1263	1221	1264	2189	468	255	286	236	624	913	678	1082	910
2009-05-31	354	1893	2520	1526	2413	2937	2274	3769	2125	3202	1646	3373	1824	1649	2570	2285	4014	2608	824	510	1276	1187	799	943	728	801	687	1207	480	2610	2154	1382	431	422	2127	1478	1446	1473	1560	1801	793	409	521	391	395	1181	811	1399	1147
2009-06-07	463	1750	1927	1242	1905	2223	1709	3083	1724	2628	1757	3171	1621	1613	2522	2043	3648	2541	637	401	1720	1357	977	1319	891	910	831	1431	551	2305	2489	1516	514	561	1932	1349	1235	1262	1997	1743	953	456	609	428	540	1609	994	1640	1336
2009-06-14	741	1625	1419	1069	1466	1615	1206	2950	1530	2458	1824	3359	1738	2052	2856	2277	3850	2960	477	347	2061	1367	1171	1971	998	985	1146	1562	534	2264	2084	1349	474	890	1795	1311	1130	1078	2331	1402	1056	423	619	385	907	1865	1025	1737	1438
2009-06-21	1059	1407	1358	961	1424	1551	1082	2037	1046	1764	1450	2539	1401	1582	2405	2019	2539	2499	478	381	1892	1166	1048	2128	948	894	1008	1406	393	1766	902	830	337	1113	1563	1142	869	978	2139	858	838	300	455	312	1216	1663	842	1522	1236
2009-06-28	1126	1262	1018	728	1110	1144	795	1837	936	1653	1481	2646	1408	1802	2295	2156	2224	2492	371	284	1726	1066	939	2244	1004	877	804	1265	330	1552	578	559	280	1124	1385	1044	677	847	1963	560	749	263	376	293	1288	1527	743	1392	1093
2009-07-05	739	1132	1074	737	1179	1219	802	2291	1173	1968	1844	3486	1716	2390	2217	2627	2514	2714	394	321	1499	1062	899	2088	1046	843	708	1152	272	1855	559	493	224	730	1223	969	444	712	1805	488	673	219	303	241	823	1451	694	1340	971
2009-07-12	908	998	836	632	935	947	648	2020	1132	1996	1537	3094	1538	1878	1767	2251	2214	2323	331	271	1203	924	736	1521	1055	810	657	911	291	1624	312	327	249	841	992	834	222	454	1387	326	760	250	328	272	942	1158	569	1102	774
2009-07-19	1068	1128	917	721	1081	1049	736	1862	1163	2022	1448	2904	1548	1771	1644	1987	2119	2053	392	320	992	935	618	1116	1009	743	630	754	273	1465	287	302	239	909	1176	1010	108	254	1160	251	723	245	308	267	1041	959	456	910	619
2009-07-26	979	1306	865	746	1029	1003	723	1751	1269	2053	1311	2806	1626	1900	1752	1916	2103	2049	400	319	991	1149	721	1034	1166	968	615	737	225	1415	358	398	208	781	1365	1156	115	304	1143	281	589	222	261	239	915	997	524	950	597
2009-08-02	988	1056	734	685	875	834	627	1327	1033	1481	948	2037	1283	1268	1290	1358	1608	1553	351	291	988	1181	861	874	1139	1073	619	713	182	1023	387	497	174	767	1080	925	57	156	1149	288	449	195	213	232	903	967	538	907	601
2009-08-09	1263	1284	666	667	757	739	557	928	773	1010	593	1463	1017	808	860	925	1126	1177	321	255	910	1115	902	702	963	1034	494	667	103	713	267	432	103	940	1423	1228	141	359	1089	231	241	118	124	146	1110	888	552	825	597
2009-08-16	2076	1370	713	1003	804	802	663	778	720	833	594	1270	994	680	690	822	1036	1026	361	308	795	985	839	580	818	842	481	588	86	612	351	526	96	1205	2204	1789	87	216	931	268	185	104	105	123	1355	763	521	697	509
2009-08-23	4120	1881	866	1549	992	1018	891	764	773	774	728	1231	999	661	887	745	939	991	464	520	764	884	848	540	867	833	1129	566	154	553	395	683	217	1309	5305	4471	40	93	805	239	335	215	215	254	1075	673	500	620	442
2009-08-30	6572	2369	1050	2156	1253	1284	1381	634	821	631	600	1026	992	586	719	656	731	734	707	1005	1129	1330	1315	704	1360	1248	1834	653	234	435	916	1661	442	2041	5899	5501	22	44	1068	466	516	495	370	566	1367	875	813	837	520
2009-09-06	8049	4151	1566	2517	1748	2124	2492	857	1538	710	926	1183	1432	777	997	837	836	836	1338	1644	1670	2533	1780	1236	1604	1637	2029	964	293	511	931	1445	697	3435	6408	4909	69	101	1769	453	592	847	533	857	3698	1093	1430	1311	845
2009-09-13	6711	6579	2093	3011	2158	3155	2906	2199	2449	1024	1277	1568	2022	1256	1385	1552	1180	1195	1594	1921	2075	2972	2145	1595	1707	1906	2076	1556	457	789	815	1178	1053	3654	7869	6019	263	210	2511	457	959	1124	833	1134	4722	1866	1775	2109	1732
2009-09-20	6027	7184	2612	4183	3191	3461	3147	2764	2114	987	1552	1431	1833	1513	1264	1816	1177	1287	1821	2594	2253	3213	2679	1902	1916	1917	2058	1834	654	851	1416	2523	1264	5160	7363	5941	305	189	3304	1012	1693	1516	1109	1323	4924	2343	2759	2595	2404
2009-09-27	6943	7357	4751	8283	6912	5916	6135	3139	2677	1485	2443	1800	2898	2316	2203	2726	1650	2083	3418	4220	3281	4005	4105	2385	2739	2511	2536	3078	1428	1223	2078	4262	1912	8869	6436	4837	355	199	4479	1651	3626	2392	1906	2423	5643	3619	4022	3391	3445
2009-10-04	5010	6796	10907	12718	12237	11534	11068	3328	3557	2502	3407	2218	4160	3629	3388	3829	2506	3146	5386	5605	3798	3585	3506	2420	3144	2852	2547	3475	3094	2717	3009	7701	4069	8543	4213	3342	459	242	5283	2940	5476	3907	3082	3658	4107	4650	4442	4048	5116
2009-10-11	3852	6056	15500	13494	15057	13822	15073	3565	5354	4278	4734	2712	5818	5660	5214	5614	3693	4425	5809	5799	4983	3757	3306	2939	3247	2826	1841	3726	6782	8879	5177	10883	5977	7756	3653	3058	1391	776	7371	5624	8326	5621	5214	5348	3539	5936	5216	4166	5977
2009-10-18	2875	5362	11815	10242	11084	11602	12989	4324	6548	6589	6503	3176	6426	7297	6555	7039	5017	6234	3789	4209	7168	4187	4183	3524	4066	3691	4486	4013	8434	14308	7281	12423	5973	6835	3187	2695	3680	1477	10490	12991	10601	6714	8247	6327	2699	8123	7455	5122	6787
2009-10-25	2462	3623	8669	7383	8267	8031	8912	4502	5809	6470	6664	4305	4849	6857	6272	6141	5409	7271	2347	2249	6042	3459	3878	2449	2761	2977	3545	3151	5147	10651	6412	7582	3815	5230	2369	1933	4970	2498	7121	12521	7064	3933	5265	3887	2566	6867	4962	4208	4919
2009-11-01	2117	2986	5266	5035	5986	5931	6777	4534	4802	7227	6517	6322	4610	7802	5892	6353	5716	7004	1507	1247	3798	2333	2369	1773	1814	2132	2405	2539	2937	7756	5161	4769	2147	3508	1985	1890	5852	3726	4167	7374	4360	2110	3304	1975	2328	4177	2886	2964	3095
2009-11-08	1719	1694	3523	2833	4089	3942	4135	3710	3536	6445	4057	6556	3404	5178	4129	3984	4601	4947	956	834	2680	1630	1417	1070	1309	1512	1541	2002	1567	5388	3397	2866	1169	2570	1250	1204	6315	4376	2657	4154	2387	1181	1744	1083	2028	2741	1742	2058	2001
2009-11-15	1086	851	2063	1504	2286	2460	2063	3220	2860	5110	3004	5545	2581	3742	3058	3305	3651	3884	566	416	1296	917	777	588	726	831	935	1190	709	3741	2350	1942	551	1583	686	599	3298	3327	1368	2604	1151	565	871	522	1267	1492	982	1172	1097
2009-11-22	884	428	1500	970	1576	1660	1348	2398	1948	3474	1718	4144	1787	2426	2021	2114	2680	2761	378	289	489	413	340	271	322	377	395	572	424	2510	1162	1205	332	1189	392	333	1855	2925	625	1506	636	328	507	321	1027	612	431	561	486
2009-11-29	1002	445	1065	865	1132	1088	915	1361	1052	1781	1045	2445	1015	1183	1220	1159	1603	1612	259	261	464	388	332	267	287	336	376	554	210	1298	722	764	166	1236	442	369	949	1912	591	825	322	158	242	177	1131	544	383	511	451
2009-12-06	749	233	664	502	643	676	581	1149	820	1287	693	2020	858	857	868	1030	1302	1267	162	155	221	205	173	142	142	172	179	291	103	998	454	510	87	862	231	198	428	1078	326	506	166	80	124	97	863	291	195	267	225
2009-12-13	720	308	376	301	393	383	348	900	615	1002	582	1709	633	650	661	799	1072	1032	95	109	207	181	169	114	126	150	167	258	98	800	265	279	85	747	303	266	274	779	282	267	158	86	117	91	803	259	170	240	203
2009-12-20	299	353	242	205	239	253	242	701	494	749	526	1314	491	480	479	591	793	778	63	66	190	180	162	110	114	138	185	246	65	591	130	135	54	277	336	290	169	485	266	130	105	61	76	60	318	247	170	225	185
2009-12-27	464	318	289	293	293	309	304	520	347	538	404	993	410	445	442	444	568	592	82	85	274	226	216	137	150	178	220	297	52	416	141	144	47	419	310	276	155	432	321	128	92	54	64	54	479	295	219	274	227
2010-01-03	457	296	147	159	146	154	147	364	255	362	309	716	330	342	374	335	399	446	45	47	256	209	217	139	173	167	205	253	33	290	91	101	31	366	283	275	144	343	293	75	57	40	43	37	427	267	196	236	200
2010-01-10	769	431	122	121	138	125	121	153	111	153	110	296	129	124	141	147	169	178	43	37	379	310	326	205	290	258	289	386	54	113	129	154	55	639	433	411	27	59	469	146	95	64	74	58	744	381	288	349	296
2010-01-17	932	616	119	116	141	123	117	110	83	110	69	222	83	81	92	100	126	124	44	41	401	360	327	221	281	295	304	398	53	79	58	62	52	747	653	580	61	129	474	58	87	63	73	53	882	403	340	363	320
2010-01-24	617	558	95	98	120	97	98	172	131	174	120	362	141	126	143	160	204	194	37	34	327	257	224	166	207	198	216	270	46	124	76	81	44	539	666	543	156	333	346	78	78	51	63	55	628	284	247	271	229
2010-01-31	703	528	109	104	118	106	111	213	190	209	172	364	227	164	205	192	251	238	42	46	383	325	286	221	255	248	316	347	43	157	63	65	41	633	660	609	71	142	496	62	72	46	57	54	730	360	303	357	295
2010-02-07	525	440	82	92	89	84	89	111	93	98	86	120	107	88	115	103	118	111	32	36	413	404	329	226	286	277	352	388	70	72	42	45	69	426	609	617	113	203	555	44	118	74	93	84	547	389	336	403	326
2010-02-14	641	424	34	35	36	35	36	107	97	87	81	91	97	85	101	94	109	111	13	14	374	429	369	221	314	256	339	363	81	67	104	107	78	462	652	718	150	269	489	113	123	92	104	98	635	370	344	442	310
2010-02-21	1085	529	27	23	24	25	27	119	119	94	83	101	116	97	117	97	120	123	11	11	469	516	468	284	356	309	381	421	73	74	90	102	73	798	932	954	78	149	524	117	119	84	88	81	1144	421	397	574	397
2010-02-28	829	747	49	40	42	46	50	83	81	61	53	78	87	59	74	76	82	82	20	17	446	497	480	278	329	287	389	402	103	51	167	187	109	618	1381	1146	64	117	489	212	165	131	126	104	897	396	352	546	371
2010-03-07	874	715	113	87	90	99	115	81	74	52	52	74	76	52	59	72	72	74	45	38	535	605	573	327	395	349	431	489	123	45	71	90	131	641	1148	794	28	54	614	98	182	144	164	123	1094	458	421	651	481
2010-03-14	867	595	73	54	59	64	68	37	33	25	22	34	30	24	26	30	33	30	30	22	453	528	531	313	353	319	351	446	83	21	104	112	85	689	801	536	0	0	512	121	118	87	103	77	1147	394	339	528	413
2010-03-21	433	555	54	40	47	50	50	52	44	37	25	44	38	33	32	36	49	41	23	17	307	416	352	234	265	230	227	314	66	31	65	86	69	392	656	461	12	23	386	87	102	72	85	60	639	295	253	355	309
2010-03-28	563	355	69	47	66	66	60	168	148	127	84	151	117	100	104	121	176	135	29	19	233	284	240	164	185	163	156	218	73	111	97	118	73	527	403	282	0	0	295	125	111	73	92	65	874	208	171	233	217
2010-04-04	189	129	115	80	118	120	96	74	68	59	41	67	48	40	47	60	83	61	50	34	145	153	133	91	101	100	82	129	36	54	118	137	33	199	143	108	32	71	175	150	54	33	43	31	338	126	97	131	126
2010-04-11	73	87	78	55	84	84	67	163	150	134	91	134	108	88	111	129	195	139	35	25	75	84	71	48	51	57	42	71	55	128	15	19	50	80	91	67	74	165	106	22	82	48	67	42	135	74	54	71	68
2010-04-18	32	66	40	31	45	43	36	113	99	98	69	96	79	65	86	87	147	97	18	12	54	58	50	37	38	42	30	52	15	99	8	9	14	36	68	51	0	0	81	11	24	14	20	12	59	55	37	52	52
2010-04-25	0	53	37	32	42	40	35	22	19	20	14	19	17	14	19	17	31	19	17	13	34	32	29	20	20	23	19	28	0	21	21	20	0	0	52	41	0	0	47	26	0	0	0	0	0	30	19	29	28
2010-05-02	14	8	13	11	15	15	13	51	41	43	32	44	41	30	43	38	72	42	6	5	28	25	22	17	18	19	16	23	16	49	11	11	15	15	8	7	73	168	42	13	26	15	20	14	25	25	16	24	24
2010-05-09	0	25	15	12	17	16	15	27	21	22	14	22	21	16	19	22	39	22	7	5	18	16	14	10	12	12	10	14	11	26	32	36	10	0	24	20	25	64	28	42	18	10	13	10	0	16	10	16	15
2010-05-16	0	8	6	5	7	7	7	53	38	43	32	47	43	32	41	47	78	44	3	3	26	20	18	16	16	15	14	19	5	52	34	39	4	0	8	7	0	0	38	37	9	5	6	4	0	21	13	21	19
2010-05-23	0	9	0	0	0	0	0	25	18	20	16	23	19	15	18	22	37	20	0	0	0	0	0	0	0	0	0	0	5	25	0	0	5	0	9	8	0	0	0	0	9	5	6	5	0	0	0	0	0
2010-05-30	0	9	11	9	12	13	12	33	23	25	25	32	27	21	25	30	50	27	5	4	0	0	0	0	0	0	0	0	0	34	0	0	0	0	9	8	15	40	0	0	0	0	0	0	0	0	0	0	0
2010-06-06	0	9	20	16	21	23	21	11	7	8	7	11	9	7	7	9	17	9	9	7	6	5	4	4	4	4	3	5	0	12	13	16	0	0	9	8	0	0	9	16	0	0	0	0	0	5	4	6	5
2010-06-13	0	10	0	0	0	0	0	27	19	22	16	26	24	17	16	22	44	22	0	0	11	9	7	7	7	7	6	8	0	31	0	0	0	0	10	9	0	0	16	0	0	0	0	0	0	8	6	10	8
2010-06-20	0	0	0	0	0	0	0	50	37	41	33	48	43	29	30	39	85	42	0	0	0	0	0	0	0	0	0	0	5	59	0	0	5	0	0	0	0	0	0	0	10	5	6	5	0	0	0	0	0
2010-06-27	0	0	8	7	8	9	8	0	0	0	0	0	0	0	0	0	0	0	3	3	0	0	0	0	0	0	0	0	5	0	0	0	6	0	0	0	18	52	0	0	11	6	7	5	0	0	0	0	0
2010-07-04	0	0	0	0	0	0	0	13	9	11	8	11	9	8	10	8	21	10	0	0	11	8	6	6	5	6	5	7	0	15	22	33	0	0	0	0	0	0	14	31	0	0	0	0	0	7	5	9	7
2010-07-11	0	22	0	0	0	0	0	9	7	8	6	8	6	6	7	6	17	8	0	0	24	17	13	15	11	14	11	16	22	12	33	41	23	0	23	20	0	0	30	38	47	24	29	21	0	16	11	20	16
2010-07-18	17	0	0	0	0	0	0	19	13	16	10	16	13	14	13	13	34	16	0	0	14	10	8	9	7	8	6	9	4	25	29	36	5	18	0	0	0	0	18	34	9	5	6	5	25	10	7	12	9
2010-07-25	0	11	45	36	46	48	37	29	21	24	18	24	19	20	21	22	54	24	17	14	10	7	5	7	5	6	5	7	18	39	83	109	19	0	11	9	54	157	13	104	37	21	23	19	0	7	5	8	6
2010-08-01	0	27	0	0	0	0	0	10	7	9	7	9	6	7	9	9	19	8	0	0	36	27	21	26	19	22	20	25	9	14	0	0	9	0	27	24	0	0	49	0	18	10	11	9	0	25	17	30	24
2010-08-08	29	23	19	17	20	22	16	29	20	24	19	24	19	19	21	26	52	22	7	5	94	72	60	67	53	57	54	66	8	39	14	18	8	32	22	19	116	350	140	17	16	8	9	8	38	67	46	79	63
2010-08-15	0	0	13	13	14	16	12	61	41	49	42	53	47	39	55	56	109	45	5	5	38	28	23	24	21	21	20	24	5	82	14	17	5	0	0	0	18	49	52	15	10	5	6	5	0	24	16	29	23
2010-08-22	13	24	7	7	7	8	6	81	57	66	58	73	66	49	71	79	149	60	2	2	100	66	58	57	55	53	59	59	7	111	30	35	7	15	23	23	20	54	138	29	14	8	8	7	16	60	42	67	55
2010-08-29	11	19	6	7	6	7	6	46	33	36	44	42	39	29	40	42	83	36	2	3	47	30	29	27	25	25	32	27	10	63	25	32	11	12	18	20	24	64	64	25	22	12	12	13	13	25	20	30	24
2010-09-05	0	35	6	8	6	7	6	63	45	48	76	61	53	43	58	62	111	51	2	3	107	60	62	57	53	48	73	55	0	84	49	51	0	0	34	38	0	0	134	40	0	0	0	0	0	51	42	60	49
2010-09-12	25	30	15	24	15	17	18	52	41	41	69	55	46	46	56	56	95	47	6	8	129	67	65	65	55	52	73	56	8	73	37	41	8	23	28	38	0	0	142	32	18	10	8	11	21	53	51	61	49
2010-09-19	29	24	42	71	44	49	56	50	41	39	62	55	44	53	51	53	88	47	17	24	119	61	63	64	60	48	67	49	8	67	58	60	8	26	23	32	0	0	135	51	20	10	9	12	22	48	65	56	45
2010-09-26	0	41	27	45	29	32	43	48	40	39	56	54	43	54	47	53	81	45	11	14	94	51	55	46	53	39	51	38	0	62	36	38	0	0	38	57	0	0	102	37	0	0	0	0	0	37	55	44	37
2010-10-03	31	45	33	49	34	38	51	104	92	87	99	132	107	107	113	119	170	100	13	16	161	100	102	83	87	77	102	64	6	134	0	0	7	26	45	61	13	15	191	0	17	8	6	11	18	70	97	86	68
2010-10-10	47	100	77	104	88	102	117	93	84	77	89	124	90	84	111	102	145	93	33	37	251	166	154	127	131	125	155	96	9	116	58	63	10	44	90	126	15	16	284	69	24	13	9	14	27	109	141	138	112
2010-10-17	58	112	22	26	25	29	31	137	108	103	122	143	101	113	130	131	167	119	10	11	346	243	215	174	169	162	204	120	7	132	35	38	8	61	116	142	11	12	400	39	19	10	7	11	32	148	181	193	154
2010-10-24	101	150	91	103	104	110	112	190	139	154	176	192	141	168	191	176	209	161	40	48	333	227	191	174	147	163	190	115	21	171	19	23	22	104	162	170	44	44	397	23	51	25	17	26	53	159	173	211	172
2010-10-31	237	173	169	191	175	184	180	135	98	116	147	128	94	122	133	114	136	108	72	77	482	350	288	294	246	245	345	194	21	113	54	57	20	285	191	179	24	23	613	53	46	23	18	22	125	260	282	325	279
2010-11-07	295	127	181	212	192	200	207	88	65	85	86	81	68	76	75	80	86	72	79	74	697	524	438	428	367	354	585	315	19	73	75	78	17	323	151	145	17	14	861	78	36	19	18	18	144	445	450	462	424
2010-11-14	443	258	349	426	422	415	404	166	127	160	173	165	149	143	164	166	164	140	156	156	721	552	457	482	382	354	677	393	54	139	138	146	51	435	332	283	75	57	940	130	95	49	54	54	219	490	537	529	454
2010-11-21	603	372	400	500	517	509	493	179	139	181	180	197	177	174	178	182	183	160	175	170	763	616	560	548	454	437	826	494	101	157	111	134	94	490	459	372	61	46	1095	129	168	86	98	96	272	608	614	641	581
2010-11-28	1257	328	505	606	683	656	640	269	233	285	299	307	313	235	314	255	270	260	216	211	810	538	512	511	385	389	743	502	99	231	234	245	90	971	400	332	65	45	957	222	165	86	102	84	600	561	512	585	551
2010-12-05	1708	530	979	1112	1293	1217	1343	332	289	335	317	372	326	319	326	271	306	327	368	362	778	565	573	513	408	377	762	585	151	262	314	370	135	1375	626	524	329	219	966	348	247	126	158	138	818	555	495	576	556
2010-12-12	3732	1284	1418	1714	1763	1764	2592	312	274	313	300	340	290	352	326	269	276	315	497	473	1168	773	992	660	670	564	1156	943	237	240	608	652	220	2070	1412	1395	364	239	1331	655	381	213	247	245	1250	795	757	760	753
2010-12-19	6001	1735	2134	2721	2289	2366	3929	514	455	504	488	568	408	615	586	431	440	507	670	789	1521	960	1811	972	1100	758	1844	1415	375	379	1039	966	377	2142	1871	2120	622	379	1758	978	635	382	445	447	1693	968	1206	972	945
2010-12-26	6174	1764	2373	3038	2272	2323	3934	707	603	671	823	815	562	899	840	623	591	701	694	954	1561	878	1780	1223	1425	862	1867	1458	445	500	1656	1903	484	2542	1713	2374	1200	686	1742	1520	834	511	540	702	2771	959	1416	900	954
2011-01-02	4217	2190	2448	2714	2187	2139	3502	796	704	734	1007	918	756	1104	1019	926	611	830	632	877	1518	923	1614	1129	1549	1148	1401	1515	480	525	2014	2155	554	2526	2211	3016	1586	656	1884	1750	867	528	526	841	3456	1077	1369	918	1022
2011-01-09	2883	2552	3047	2593	2800	2369	3380	1029	893	1166	1389	1266	1108	1361	1326	1408	796	1147	752	894	1968	1262	1801	1201	1635	1564	1136	1651	782	683	2159	2351	894	2636	2890	3251	1376	669	2398	2079	1361	791	844	1104	3694	1840	1569	1307	1392
2011-01-16	2739	3220	4103	3186	3761	2997	3557	1488	1198	1726	1856	2083	1516	1378	1923	1672	1002	1530	909	1273	2422	1791	2262	1344	1720	1907	1339	1880	955	861	2817	4371	1001	2838	4017	4374	1714	963	2884	2431	1506	778	944	1388	4473	2666	1743	2177	1836
2011-01-23	3059	3737	3804	3511	3984	3078	3494	1585	1190	1989	1790	2093	1583	1650	1779	1493	955	1550	1105	1424	2597	1989	2276	1371	2151	2211	1793	1717	1432	813	3260	5059	1203	3070	5263	5480	1801	907	2951	2745	1788	906	1286	1461	4337	3811	2385	2919	2236
2011-01-30	3114	4527	4309	4030	4752	3878	3601	2150	1500	2516	2207	2364	1789	1663	2110	1899	1075	1830	1309	1515	2657	2356	2252	1616	2217	2292	2228	1782	1692	922	2471	3689	1364	3269	6155	5112	1876	1071	3097	2537	1944	951	1565	1385	3814	5187	3587	3631	3725
2011-02-06	3259	5274	5444	5549	5246	5146	3884	2370	1611	2463	2499	2526	1864	2311	2337	2082	1106	1912	1382	1657	2699	2123	1936	1421	1833	2045	1938	1534	1866	934	2617	4306	1396	4128	6044	4273	2292	1366	3173	2755	2207	1235	1743	1395	3327	5204	4118	3908	4993
2011-02-13	3580	6363	6285	5928	6039	5726	4311	3103	2298	3015	3260	3373	3023	2873	3319	2834	1396	2382	1569	1722	2453	2127	1621	1344	1652	1916	2315	1624	2016	1248	2302	3258	1713	4266	6940	4913	2379	1807	3280	3209	2969	1549	1934	1277	3195	4681	3714	3483	5113
2011-02-20	2996	4433	4967	3611	5330	4213	3216	2911	2869	2806	2453	3355	3014	2343	2990	2709	1586	2185	1398	1288	1982	1653	1324	1012	1305	1448	1563	1640	2059	1510	2012	2587	1728	3324	4600	3254	1963	2039	2718	3045	2915	1583	1706	1194	2655	3290	2477	2493	3452
2011-02-27	2334	2817	3747	2331	4080	2979	2296	2617	3370	2747	2174	3466	2898	2224	2917	2645	2321	2178	1042	973	1340	1167	919	845	894	998	978	1349	1852	2696	1782	2422	1588	2480	2657	2043	1443	1780	1938	2838	2507	1366	1536	1055	2158	2153	1310	1707	2230
2011-03-06	1287	1663	2685	1723	2967	2142	1602	2520	2886	2281	1818	3122	2801	1944	2224	2425	2225	2251	721	718	952	870	681	587	579	629	649	977	1570	3198	1333	1675	1377	1483	1481	1220	1060	1675	1334	2198	2439	1235	1529	1007	1454	1326	776	1098	1388
2011-03-13	820	1033	1701	920	1890	1422	1189	1888	2041	1660	1076	2270	1906	1104	1309	1730	1735	1793	470	421	650	595	465	383	393	428	420	708	1249	2306	1157	1552	1079	996	883	726	764	1563	947	2043	2045	992	1241	837	1082	834	541	697	848
2011-03-20	367	585	1069	546	1182	821	779	1394	1473	1241	806	1557	1317	813	1057	1181	1356	1473	297	262	450	377	320	235	267	297	254	454	817	1511	631	795	703	449	470	427	579	1393	660	1146	1379	633	816	506	517	527	341	454	514
2011-03-27	190	367	744	421	833	586	559	778	762	689	469	827	706	502	560	639	799	807	225	178	340	276	238	184	203	208	198	320	547	809	646	798	494	246	298	271	404	1035	475	1162	897	422	552	340	293	369	227	317	346
2011-04-03	161	83	478	287	546	384	383	455	436	388	272	482	384	277	300	369	491	503	151	110	238	190	161	133	146	145	136	222	368	440	456	547	329	205	69	63	437	1027	329	860	589	282	396	230	249	255	156	217	240
2011-04-10	188	111	251	151	311	206	206	269	247	224	164	272	226	173	203	236	296	309	88	58	193	151	125	110	113	118	109	173	202	250	245	329	171	236	94	84	277	721	269	545	318	152	210	122	297	197	118	180	180
2011-04-17	52	152	110	70	140	94	89	215	196	188	139	233	182	154	158	184	243	246	40	27	48	40	30	29	30	30	28	44	110	204	172	198	98	64	126	112	198	598	69	319	177	86	123	70	81	51	30	47	45
2011-04-24	42	111	56	39	71	48	48	101	86	86	66	103	77	70	76	84	107	108	21	14	100	80	65	59	59	59	60	89	76	86	83	102	66	50	93	87	90	293	141	158	115	59	83	47	64	101	60	98	92
2011-05-01	0	45	6	4	8	5	5	94	73	78	53	92	73	64	68	73	94	95	2	2	52	42	34	33	32	31	33	45	60	77	47	55	54	0	40	36	31	117	72	78	94	49	66	40	0	53	32	50	46
2011-05-08	21	0	32	25	42	30	32	44	32	37	29	45	35	32	33	35	45	44	13	10	30	24	20	19	18	18	18	25	26	36	45	52	23	25	0	0	0	0	41	70	44	21	29	18	33	30	18	28	26
2011-05-15	0	0	29	22	36	27	31	52	37	45	35	54	41	36	44	44	54	52	12	9	18	15	13	12	11	11	13	15	22	42	19	22	20	0	0	0	0	0	26	27	37	18	25	16	0	19	11	17	17
2011-05-22	0	14	6	5	7	6	7	42	28	36	26	43	32	30	35	35	41	40	2	2	16	12	11	11	9	9	10	12	14	31	0	0	14	0	13	11	21	69	20	0	26	12	17	11	0	15	10	14	13
2011-05-29	0	31	12	11	15	12	14	27	17	23	17	26	20	20	20	22	26	24	5	5	17	11	10	10	8	8	10	11	0	20	8	10	0	0	29	24	7	20	19	11	0	0	0	0	0	14	9	13	12
2011-06-05	0	14	0	0	0	0	0	18	12	15	11	16	13	13	12	14	17	16	0	0	12	8	8	8	6	6	7	9	0	13	0	0	0	0	15	12	0	0	15	0	0	0	0	0	0	11	7	10	9
2011-06-12	0	0	0	0	0	0	0	0	0	0	0	0	0	0	0	0	0	0	0	0	44	31	27	28	23	23	25	30	6	0	0	0	6	0	0	0	0	0	56	0	11	5	7	5	0	38	24	34	33
2011-06-19	0	0	0	0	0	0	0	18	12	15	10	17	14	11	14	14	18	16	0	0	0	0	0	0	0	0	0	0	0	14	14	22	0	0	0	0	0	0	0	20	0	0	0	0	0	0	0	0	0
2011-06-26	0	0	0	0	0	0	0	22	15	18	12	20	16	13	14	16	21	19	0	0	17	11	10	10	8	9	8	11	0	16	0	0	0	0	0	0	0	0	22	0	0	0	0	0	0	14	9	13	12
2011-07-03	0	18	0	0	0	0	0	10	7	8	5	10	7	6	6	7	9	9	0	0	7	5	5	5	4	4	4	5	7	7	0	0	7	0	19	15	0	0	10	0	13	6	8	6	0	6	4	6	6
2011-07-10	0	0	0	0	0	0	0	11	8	10	7	12	9	7	8	8	12	11	0	0	50	38	30	32	27	26	24	33	0	9	0	0	0	0	0	0	0	0	72	0	0	0	0	0	0	41	24	37	38
2011-07-17	0	15	0	0	0	0	0	17	13	16	10	17	13	11	12	12	19	16	0	0	44	30	25	27	22	21	20	26	0	13	0	0	0	0	16	13	0	0	58	0	0	0	0	0	0	33	20	30	30
2011-07-24	0	0	0	0	0	0	0	0	0	0	0	0	0	0	0	0	0	0	0	0	27	19	15	17	14	14	13	17	0	0	0	0	0	0	0	0	0	0	37	0	0	0	0	0	0	21	12	18	19
2011-07-31	0	0	0	0	0	0	0	52	38	44	33	51	35	34	36	38	54	50	0	0	37	25	20	22	18	18	17	22	0	38	9	14	0	0	0	0	0	0	51	11	0	0	0	0	0	27	16	24	24
2011-08-07	0	33	0	0	0	0	0	12	9	10	8	12	8	8	8	9	12	11	0	0	48	34	26	29	24	23	22	27	5	8	0	0	4	0	35	29	0	0	65	0	8	4	5	4	0	35	20	30	32
2011-08-14	0	22	7	5	8	8	7	39	30	33	26	38	25	28	29	31	39	36	3	2	44	30	23	26	21	21	21	25	4	27	8	10	4	0	22	19	0	0	59	8	8	4	5	4	0	30	18	26	27
2011-08-21	0	24	19	15	22	19	17	0	0	0	0	0	0	0	0	0	0	0	7	6	55	35	28	30	25	25	28	29	0	0	23	25	0	0	23	22	0	0	70	21	0	0	0	0	0	35	22	31	32
2011-08-28	0	8	0	0	0	0	0	15	12	13	19	16	10	13	22	14	15	15	0	0	65	33	26	31	25	24	41	27	0	11	25	25	0	0	9	8	0	0	67	17	0	0	0	0	0	32	24	29	29
2011-09-04	0	0	5	7	6	5	6	22	19	20	33	23	15	21	38	21	22	21	2	2	60	23	17	24	17	17	37	19	0	16	0	0	0	0	0	0	0	0	47	0	0	0	0	0	0	20	18	19	19
2011-09-11	0	6	0	0	0	0	0	37	29	31	57	37	24	34	70	37	33	32	0	0	96	34	27	46	26	27	71	27	0	25	23	20	0	0	7	6	0	0	69	10	0	0	0	0	0	28	29	27	27
2011-09-18	0	7	9	16	10	10	15	0	0	0	0	0	0	0	0	0	0	0	4	6	97	31	28	46	26	26	72	22	13	0	16	13	11	0	9	8	0	0	67	7	26	13	13	16	0	23	32	24	21
2011-09-25	0	0	15	28	16	17	25	24	18	20	45	26	19	29	51	31	17	19	6	10	194	62	61	110	63	55	148	40	7	14	0	0	5	0	0	0	0	0	158	0	14	7	6	11	0	43	79	47	40
2011-10-02	0	14	0	0	0	0	0	45	31	37	63	50	35	48	78	47	26	29	0	0	83	31	32	51	33	25	66	18	15	23	91	77	11	0	27	18	128	78	72	49	33	18	12	22	0	18	37	22	17
2011-10-09	0	14	0	0	0	0	0	56	38	46	73	56	45	54	97	49	29	33	0	0	53	25	22	30	22	17	43	13	6	27	23	19	4	0	28	18	42	24	45	15	16	8	5	9	0	12	25	18	11
2011-10-16	0	23	5	9	7	8	9	62	45	53	64	58	50	60	101	48	31	36	3	4	96	46	40	57	43	31	84	28	0	31	21	19	0	0	42	27	0	0	84	18	0	0	0	0	0	22	48	44	25
2011-10-23	0	29	18	25	23	22	26	118	94	112	132	111	102	105	167	88	57	75	8	12	152	69	62	94	65	47	135	51	0	64	0	0	0	0	39	27	44	26	118	0	0	0	0	0	0	35	81	70	42
2011-10-30	0	37	6	8	8	8	8	86	72	88	110	79	71	73	132	68	43	58	3	4	107	47	43	62	54	34	99	40	14	52	65	53	12	0	48	35	0	0	83	51	32	14	12	16	0	28	63	49	38
2011-11-06	0	42	60	80	83	75	69	28	26	29	35	26	23	27	46	27	16	23	27	36	165	72	67	95	91	57	157	63	8	19	36	35	7	0	51	39	0	0	122	31	16	7	7	9	0	47	107	78	60
2011-11-13	80	0	30	42	42	35	32	53	55	62	71	54	49	54	96	53	41	48	15	21	98	46	42	51	54	37	88	42	27	37	0	0	24	149	0	0	0	0	82	0	55	24	27	33	123	36	67	49	40
2011-11-20	43	85	92	132	121	96	92	62	64	68	77	66	60	64	93	61	46	56	44	64	265	123	115	151	151	104	209	112	10	44	0	0	9	77	94	78	55	25	246	0	20	10	11	11	74	99	188	126	109
2011-11-27	26	24	143	216	177	146	149	70	73	72	100	83	70	83	129	72	54	62	66	90	209	87	84	124	110	72	180	83	17	49	71	42	17	54	26	23	0	0	177	50	32	18	18	18	46	76	134	87	90
2011-12-04	110	185	173	200	203	178	201	84	89	85	103	101	82	92	148	99	68	81	77	98	240	101	104	138	114	85	219	103	27	64	46	33	26	216	203	179	18	9	210	31	54	30	30	29	197	99	175	113	122
2011-12-11	50	38	338	369	365	293	331	114	124	124	143	158	117	120	206	143	99	117	139	164	210	81	91	122	104	78	203	92	78	94	247	163	74	117	43	38	17	9	164	153	142	87	78	82	105	88	155	95	105
2011-12-18	0	118	440	486	472	371	381	223	234	235	341	309	225	276	412	277	182	213	169	265	272	101	128	175	131	103	246	112	109	193	449	276	113	0	133	121	63	31	205	253	208	131	114	134	0	110	221	120	132
2011-12-25	129	149	371	509	356	308	302	155	167	187	282	234	182	256	333	223	133	151	138	225	262	79	111	153	107	99	225	97	127	154	672	428	130	317	170	145	242	89	192	368	248	170	137	184	288	93	191	104	111
2012-01-01	71	131	366	447	353	309	333	234	267	281	403	395	301	390	483	391	199	224	143	212	172	57	77	98	80	72	151	72	126	233	677	456	121	160	163	135	72	29	138	508	263	179	134	175	146	67	134	70	72
2012-01-08	278	209	530	517	519	436	461	227	254	272	329	385	273	296	439	368	190	216	205	226	232	83	101	140	134	108	184	116	175	229	838	612	187	568	274	222	148	71	191	765	389	238	192	210	531	109	169	104	117
2012-01-15	263	319	870	646	736	661	656	526	542	606	657	788	536	609	916	728	409	490	322	365	227	93	94	131	137	99	193	119	158	495	937	642	182	628	420	304	95	51	176	794	330	212	183	175	463	110	171	109	125
2012-01-22	265	447	975	897	883	759	765	661	558	637	693	752	604	682	1052	719	506	634	372	449	447	179	180	249	290	216	377	243	366	488	1207	748	361	504	550	416	137	79	358	881	657	441	416	506	382	227	339	213	251
2012-01-29	592	572	1258	1239	1114	883	948	701	599	655	751	793	771	836	1037	719	578	724	494	584	338	130	145	192	232	171	282	173	482	479	1929	1114	510	1068	692	535	248	164	272	1393	887	760	537	770	851	180	266	151	194
2012-02-05	512	738	1297	1341	1167	941	974	970	817	1005	1194	1098	996	1085	1388	1116	860	1098	532	584	477	179	200	251	312	235	369	244	435	687	2211	1478	488	988	1062	772	174	126	406	1662	850	712	487	704	711	279	381	251	257
2012-02-12	474	928	1298	1132	1215	987	1060	992	919	1071	1244	1125	954	1216	1377	1094	923	1126	543	671	729	282	334	401	499	365	650	386	536	741	2597	1607	627	1154	1373	892	193	125	636	1698	1103	956	638	1124	732	433	663	381	406
2012-02-19	1075	1477	1761	1768	1523	1183	1476	935	1075	983	1469	1142	978	1334	1620	1162	902	1138	665	942	1019	410	443	608	731	460	868	508	687	754	3385	1935	916	2366	2105	1399	337	246	866	1900	1425	1379	934	1775	2346	605	1037	527	544
2012-02-26	934	1809	1956	2153	1966	1444	1920	1370	1393	1312	1683	1760	1374	1565	2244	1526	1315	1527	817	983	1094	517	546	709	997	573	943	619	916	1053	3809	2106	1316	1913	2389	1916	388	321	965	2399	1943	1813	1437	2506	2043	793	999	592	652
2012-03-04	901	2231	2633	2244	3037	1942	2473	1149	1162	1017	1439	1462	1129	1122	1765	1134	1166	1204	1040	1247	1399	636	582	912	991	676	1083	755	1219	913	4518	2224	1919	1624	2797	2504	501	466	1128	2529	2391	2070	2135	3413	2064	886	1246	712	883
2012-03-11	1265	2145	3021	3159	3555	2303	3096	1402	1548	1254	1881	1912	1455	1598	2572	1625	1392	1534	1054	1513	1507	670	563	766	939	688	1115	843	1389	1153	4601	2316	2339	1979	2584	2576	649	646	1235	2523	2557	1943	2461	2698	2636	875	1244	715	849
2012-03-18	1194	1607	2631	2877	3488	2210	2810	1735	1819	1562	2069	2399	2024	1615	2956	2055	1787	1945	842	1147	1051	551	459	667	854	510	831	651	1121	1408	2959	1740	1656	1742	1894	1859	722	850	1007	1860	1917	1254	1908	1391	2196	663	837	556	639
2012-03-25	942	1157	2497	2311	3185	2349	2459	1769	2165	1645	2119	2372	2021	1456	2893	2193	1917	1935	697	864	718	368	339	607	638	352	542	461	658	1458	1579	1034	945	1185	1485	1226	512	631	666	1137	1102	602	1073	639	1700	445	475	356	415
2012-04-01	713	975	2368	1924	2762	2136	2211	1691	2031	1773	1739	2099	1740	1430	2589	2050	1870	1896	619	758	1067	465	417	790	782	444	689	560	507	1378	1183	739	641	852	1283	948	690	713	860	886	785	413	756	434	1397	557	643	422	513
2012-04-08	269	790	2205	2082	2123	1796	1584	1708	1888	1688	1556	1963	1442	1342	2184	1722	1715	1840	509	655	851	360	334	562	645	357	523	439	374	1255	1318	693	447	324	1101	739	947	921	693	861	582	320	542	362	549	432	444	310	381
2012-04-15	113	510	1373	1271	1214	1147	897	1846	2102	1820	1626	2215	1481	1504	2559	1873	1858	2022	316	424	1132	491	450	633	908	512	785	523	405	1353	1166	722	452	131	726	564	1054	1007	928	778	679	395	592	497	234	558	694	400	463
2012-04-22	305	384	1205	928	945	910	771	1162	1418	1246	1267	1534	982	821	1535	1168	1253	1384	247	346	1087	470	481	678	827	506	795	478	323	931	906	601	330	282	536	462	745	766	880	595	617	372	465	442	514	519	687	363	416
2012-04-29	527	357	862	672	753	770	613	909	1090	944	961	1138	785	612	1174	833	964	1048	198	279	974	445	454	631	714	468	713	427	251	747	959	631	258	490	474	440	663	638	807	633	519	303	332	338	850	454	556	339	372
2012-05-06	294	178	860	652	825	830	689	849	977	819	976	1055	788	532	1169	840	962	1035	217	243	988	526	483	674	717	454	609	462	140	742	1018	701	146	278	227	219	286	324	795	752	283	177	180	172	469	489	562	445	486
2012-05-13	595	155	613	506	633	607	498	850	948	856	1112	1123	828	631	1327	918	1002	1068	147	205	794	405	398	562	641	387	549	344	47	745	542	358	50	543	193	189	265	326	657	387	97	57	60	58	935	417	493	346	386
2012-05-20	75	159	349	302	372	358	282	642	716	655	792	817	586	535	954	760	754	822	85	117	796	390	435	587	654	407	581	332	35	550	461	311	36	73	223	204	209	260	625	349	66	42	42	43	111	450	510	337	366
2012-05-27	0	156	632	583	713	653	530	509	537	515	671	640	501	566	713	670	596	636	148	209	816	414	450	602	697	484	582	351	20	451	308	242	20	0	215	184	92	155	652	251	36	23	22	23	0	473	514	359	382
2012-06-03	104	156	263	222	297	263	206	412	413	429	501	520	369	486	559	493	458	483	63	78	872	427	517	805	645	552	634	377	36	366	153	116	34	99	222	189	29	43	724	117	67	39	40	45	149	507	487	393	414
2012-06-10	0	132	373	339	438	383	287	488	457	530	583	584	422	507	650	527	532	540	95	103	719	381	441	726	536	457	516	326	30	425	157	110	30	0	171	157	12	21	636	114	58	32	34	42	0	421	404	337	355
2012-06-17	39	130	100	79	111	97	69	348	320	370	403	377	273	318	395	316	350	376	25	27	516	269	300	464	410	315	326	242	0	297	110	89	0	40	168	157	31	48	472	91	0	0	0	0	55	301	280	245	251
2012-06-24	71	17	265	179	290	246	174	177	166	185	180	191	130	150	202	153	180	193	64	61	590	332	357	542	498	379	393	307	0	146	66	57	0	76	22	21	11	20	604	60	0	0	0	0	102	367	329	302	314
2012-07-01	0	18	80	48	84	76	54	207	205	207	221	231	142	148	219	171	215	229	20	19	338	186	185	271	224	196	181	167	0	172	111	99	0	0	22	21	10	20	333	111	0	0	0	0	0	201	161	166	179
2012-07-08	0	43	116	72	123	115	79	164	157	162	177	177	106	120	178	128	168	176	31	33	427	226	211	296	249	221	251	188	0	127	0	0	0	0	52	53	13	21	381	0	0	0	0	0	0	232	176	196	209
2012-07-15	25	26	13	8	13	12	8	196	186	187	214	200	124	158	234	153	199	209	4	4	279	159	140	148	193	150	177	127	5	147	0	0	5	27	31	34	0	0	267	0	9	4	6	7	37	158	123	133	142
2012-07-22	0	14	32	21	33	31	21	311	285	295	328	324	194	244	368	256	303	314	9	10	221	123	106	143	158	113	127	98	8	227	244	176	7	0	16	18	0	0	214	210	14	7	9	10	0	123	104	101	107
2012-07-29	0	36	24	16	24	23	16	361	327	340	384	377	236	307	410	296	359	378	7	9	213	108	93	123	132	93	109	86	6	273	936	673	6	0	42	48	0	0	187	780	10	5	7	8	0	103	97	85	89
2012-08-05	161	44	0	0	0	0	0	275	245	253	290	288	190	243	315	234	269	285	0	0	157	79	67	95	97	70	93	62	16	199	641	475	14	184	52	59	11	16	149	476	26	13	17	21	260	73	68	62	63
2012-08-12	22	9	73	71	74	70	54	303	256	272	344	315	214	248	399	255	289	291	21	33	267	126	101	122	150	106	157	91	20	203	356	267	19	25	11	15	11	13	233	231	33	19	22	32	35	111	113	97	96
2012-08-19	13	95	9	12	9	9	8	204	173	176	287	217	145	181	286	186	189	195	3	4	229	98	79	104	135	84	169	74	8	135	184	136	7	15	112	183	0	0	181	99	13	10	9	15	20	84	113	78	72
2012-08-26	14	9	20	30	16	16	20	139	120	128	220	154	108	156	256	157	135	134	5	11	140	57	48	71	89	49	110	43	25	92	175	128	24	16	11	21	15	15	108	89	45	40	28	57	20	47	76	46	40
2012-09-02	14	8	21	29	14	16	21	162	139	146	274	163	135	199	310	195	146	140	5	11	224	87	85	170	165	76	186	65	10	100	155	114	10	15	9	19	0	0	162	75	18	19	11	22	18	69	113	76	60
2012-09-09	18	20	42	57	27	29	43	61	52	50	97	56	53	72	118	79	51	46	9	18	270	95	124	174	168	87	211	75	12	36	67	50	12	17	26	46	0	0	209	31	23	24	13	32	19	80	177	96	70
2012-09-16	109	56	76	80	46	54	61	183	138	134	287	171	176	182	336	231	138	121	16	30	319	109	143	198	200	98	234	91	16	104	50	35	16	88	85	148	21	10	268	23	30	31	18	39	80	87	226	134	81
2012-09-23	102	44	51	51	37	40	46	140	116	104	198	135	116	155	249	152	98	85	15	22	527	185	222	323	370	167	414	169	40	83	225	194	42	94	68	110	25	9	419	111	87	74	41	112	63	145	395	255	155
2012-09-30	88	198	214	273	184	183	175	209	159	145	281	194	146	226	315	180	122	109	69	112	428	175	177	290	292	167	346	149	22	128	256	276	24	83	313	409	21	7	348	143	44	39	21	62	53	123	355	201	142
2012-10-07	180	158	98	112	84	87	84	133	111	107	196	135	98	157	206	129	88	79	34	53	654	273	260	395	442	248	509	225	88	104	91	97	103	194	210	279	22	7	517	53	178	160	88	225	141	197	461	298	215
2012-10-14	125	255	156	166	142	141	128	326	282	328	449	342	281	384	489	342	212	212	58	93	678	328	340	417	458	274	588	277	198	272	123	165	227	136	293	347	21	7	578	74	421	321	222	451	140	276	518	349	253
2012-10-21	222	356	232	236	238	246	203	403	391	406	557	379	386	396	605	384	286	285	87	128	716	385	337	432	498	276	619	316	216	336	229	297	210	239	420	505	58	20	601	153	368	283	206	379	327	336	591	352	298
2012-10-28	613	605	450	486	476	531	369	388	421	401	584	372	413	412	657	399	289	362	183	253	698	435	344	511	538	284	786	383	252	357	298	247	250	523	782	893	138	61	590	182	458	335	251	511	967	387	675	382	387
2012-11-04	1234	755	542	640	614	669	470	404	424	369	532	362	384	372	540	384	275	339	235	309	995	665	556	676	719	429	1125	538	350	336	657	445	357	1106	1118	969	160	64	806	419	579	473	360	674	2712	622	1028	519	571
2012-11-11	1871	877	639	943	800	782	660	545	661	479	852	521	552	609	880	578	391	444	333	458	1184	1025	894	937	1009	748	1934	904	534	553	1536	925	584	1320	1582	1404	194	87	1297	857	874	685	578	1110	4803	901	1443	763	883
2012-11-18	3648	1588	1223	1690	1417	1275	1222	621	916	628	995	691	695	777	962	667	485	546	609	770	1417	1341	1229	1293	1528	1119	2612	1313	591	846	3207	1948	691	1760	3965	3500	467	235	1608	1840	845	636	603	1067	8886	1117	1907	1042	1316
2012-11-25	8013	1403	1513	2441	1631	1396	1474	896	1366	1053	1544	1066	912	1201	1431	1013	733	796	750	1095	2049	1609	1775	2103	2044	1622	4083	1902	872	1642	3814	2114	1008	2272	3099	3206	797	374	1808	1979	1359	996	1019	1747	10592	1435	3324	1416	2662
2012-12-02	11740	2839	1987	3156	2276	1820	2152	768	1164	962	1470	973	884	989	1307	1011	697	724	1225	1663	3318	2013	2297	2658	2837	2357	7259	3524	1556	1685	6403	3684	541	3136	4684	5713	2176	983	2675	3071	2484	1781	1585	2795	15314	2737	7380	2793	7074
2012-12-09	13614	3759	2715	3595	2780	2214	2589	849	1221	1012	1533	1043	1096	1264	1378	1024	809	808	1802	2110	3391	1856	2198	3290	2238	2600	8215	4306	2715	2028	8873	5187	593	4618	6191	6403	2860	1561	3348	4009	3603	2531	2144	3228	20075	4623	7378	3869	9270
2012-12-16	12107	6019	4881	5695	4295	3449	3413	974	1246	1084	1706	1199	1224	1607	1539	1169	1045	948	2478	3204	4862	2236	2674	3175	3021	3471	10086	5409	3625	2516	11212	6342	1676	4849	10569	10083	5490	2017	4590	5770	4806	3138	2508	3556	19022	6207	9052	5756	9251
2012-12-23	11515	7670	6837	8934	6873	5063	4636	1473	1857	1527	3150	1851	2203	3688	2910	2368	1444	1369	2862	4772	7096	2645	4834	3151	4179	4855	11051	6538	4264	4321	13072	8346	4368	6574	11500	11709	9374	2861	6185	10649	8082	3984	4305	4800	17129	9910	9269	6612	8298
2012-12-30	7218	8718	8337	10440	9728	8293	6961	1857	2685	2299	4425	2434	3181	4983	3943	3250	1931	1569	4218	5258	6445	3472	4724	3294	4952	4505	9557	6195	4781	5079	13865	8533	5533	5749	10365	10894	9110	3856	6728	12891	10672	4715	4858	4720	11159	7805	7028	6115	6274
2013-01-06	10070	13929	12517	12444	11952	11214	10213	5688	6292	5152	7250	7216	6049	7969	7757	5972	4066	3182	5489	7254	7064	3877	5675	5179	5110	4914	8611	6862	6162	9162	12453	9025	7672	9509	11455	12889	10818	10713	7663	13841	14188	4361	7400	5230	14633	9028	6998	6955	7187
2013-01-13	5655	15950	16180	13506	13549	13894	15023	8812	9384	6508	8620	9472	7649	9457	10152	7043	7114	5941	7234	8492	6479	3712	5989	5016	5595	5165	7198	7536	6072	8186	11270	8272	6369	6861	9988	13550	8993	12391	7944	9635	12573	4569	7124	5576	7922	6706	5765	5715	5116
2013-01-20	3852	13150	16587	19329	17474	14707	15007	11232	11212	13042	14872	12617	12529	15338	12912	10720	11500	9157	5975	6555	5948	3974	4323	4349	3759	4004	6002	5945	3389	7772	8311	8473	1956	6007	8329	10604	6256	8070	5249	5874	6795	4417	5058	3882	5731	4308	4898	3941	3336
2013-01-27	3458	11465	9627	9334	8833	7727	7834	9399	9375	8624	11359	9208	9456	12319	9379	8704	9433	6798	3187	3679	3813	2470	2819	2966	2518	2589	4132	3805	2387	6635	6250	6329	2742	5437	5264	6700	2939	4574	3277	5865	4531	3160	3334	2893	5605	2851	3442	2545	2353
2013-02-03	2235	7161	5732	5817	5550	4632	4215	5867	6193	4820	6142	5767	5763	6617	5896	5310	5803	4492	2434	2399	2949	2055	2628	2522	1854	2022	3254	2900	1623	4174	3677	3308	2175	3070	3582	4441	1791	2926	2690	3216	2667	1970	1848	1748	3912	2397	2568	2184	2218
2013-02-10	1754	3934	4300	3569	3773	3609	3176	3406	4860	2989	3075	3903	3779	3785	3906	3735	3719	3182	1712	1754	2770	2027	1907	1943	1636	1714	2915	2694	1221	3079	2195	2466	1564	2448	2050	2488	1064	2061	2648	2154	1894	1437	1537	1422	2929	2247	2430	2098	2256
2013-02-17	1415	3391	2986	2537	2710	2252	2842	3107	5391	2719	3129	3361	3282	3442	3569	2622	3252	2824	1196	1211	2636	1840	1656	1823	1495	1638	2768	2388	803	2630	2687	2993	838	2200	1869	2470	1057	1622	2333	2883	1203	881	905	920	2599	1872	2316	1864	1991
2013-02-24	1402	2935	2171	2210	2333	1861	1987	2391	3629	2171	2588	2505	2444	2584	2669	1844	2291	2280	845	843	2333	1430	1397	1673	1217	1335	2534	2212	757	2025	1909	1990	650	2278	1788	1988	1222	1654	2164	2075	1008	664	700	805	2350	1723	2109	1572	1661
2013-03-03	782	2253	1766	1649	2040	1816	1562	1684	2391	1500	1903	1854	1819	1912	1916	1384	1400	1630	674	631	2247	1283	1464	1705	1499	1256	2564	2236	666	1475	1986	2264	499	1333	1412	1470	774	1173	2067	2095	940	558	613	711	1738	1730	2103	1453	1607
2013-03-10	1256	1785	1332	1097	1406	1329	1104	1363	1831	1316	1450	1587	1494	1284	1516	1392	995	1350	522	446	2217	1147	1511	1411	1417	1344	2437	2075	507	1237	1766	1969	372	2015	1184	1381	503	630	1953	1987	832	459	508	586	2606	1711	2064	1313	1559
2013-03-17	908	1302	1176	939	1112	1021	885	1081	1474	1045	962	1268	1162	1138	1330	1242	717	1113	407	391	2022	1087	1414	1007	1312	790	1997	1783	483	1066	1429	1581	366	1167	922	985	567	646	1707	1699	751	438	516	555	1454	1634	1852	1125	1611
2013-03-24	902	980	704	588	627	573	531	1014	1214	1032	933	1146	983	979	1246	1111	594	1046	247	236	1623	902	1214	737	912	814	1422	1564	372	974	1291	1354	289	948	765	802	605	636	1358	1415	540	321	409	404	1141	1283	1378	889	1271
2013-03-31	1152	727	579	482	508	456	443	890	984	824	777	1067	790	778	1099	943	460	855	201	207	1614	992	1039	846	1081	1032	1450	1545	269	869	1328	1407	217	1227	586	628	1011	929	1319	1466	434	221	312	328	1506	1338	1348	979	1190
2013-04-07	502	362	363	278	324	264	288	845	884	753	804	1015	775	900	1068	789	394	810	125	125	1035	675	692	545	680	700	792	1117	186	852	457	442	157	559	290	309	718	789	887	486	323	158	206	195	795	918	760	680	723
2013-04-14	173	238	243	208	235	185	231	787	768	659	758	841	634	738	900	754	319	773	89	90	462	349	347	289	366	351	363	591	137	724	769	814	116	205	193	204	309	480	472	888	210	128	157	130	311	497	303	357	361
2013-04-21	61	186	104	90	107	77	91	846	798	716	744	795	661	752	1069	878	309	818	37	42	387	266	237	228	253	262	286	442	79	750	740	778	69	76	154	171	279	448	354	846	111	73	87	83	114	371	231	251	260
2013-04-28	51	126	115	105	118	85	99	818	737	677	734	712	658	763	933	720	274	774	43	41	322	184	167	170	167	187	211	320	92	704	184	189	81	57	106	120	189	317	309	219	154	75	94	88	89	277	182	178	183
2013-05-05	64	114	128	118	126	102	108	594	569	520	526	541	525	583	678	548	187	528	45	46	331	188	169	191	175	173	217	309	36	492	70	63	34	67	115	107	96	188	349	77	55	31	41	32	111	264	173	181	181
2013-05-12	71	12	85	71	85	69	74	487	468	422	402	430	414	409	511	439	145	421	29	25	170	100	96	109	107	99	117	164	37	395	38	39	35	70	13	13	31	68	187	39	49	33	43	31	121	136	95	100	101
2013-05-19	75	27	60	45	62	52	51	431	449	356	408	362	322	366	471	349	131	378	20	19	238	150	149	162	166	153	151	222	0	356	129	126	0	72	27	27	0	0	252	119	0	0	0	0	122	187	143	142	154
2013-05-26	196	63	28	21	27	25	24	343	343	286	315	294	248	283	387	279	106	321	9	9	246	164	155	179	184	149	154	235	4	301	21	21	4	180	65	61	0	0	260	19	6	4	5	4	302	192	136	153	159
2013-06-02	72	60	8	6	8	8	7	289	280	243	282	244	216	262	300	235	88	286	3	3	214	131	117	148	146	117	117	185	0	246	51	52	0	63	64	58	7	17	218	43	0	0	0	0	99	148	95	120	125
2013-06-09	89	42	9	7	8	8	7	255	254	216	258	228	193	270	293	224	82	278	3	2	203	125	110	182	128	121	117	181	4	226	17	20	4	78	44	41	9	18	224	15	6	3	4	3	120	147	107	116	120
2013-06-16	0	20	9	7	8	8	7	246	239	206	271	212	196	271	306	240	79	286	3	3	200	123	104	158	124	127	121	177	4	213	42	49	4	0	21	19	0	0	213	38	6	3	4	3	0	139	100	110	117
2013-06-23	44	9	16	11	15	16	12	135	141	115	150	118	100	153	188	134	44	162	5	5	132	81	64	104	87	84	81	110	8	116	157	171	8	44	9	9	9	19	132	137	13	7	9	8	63	90	68	70	68
2013-06-30	0	48	38	29	36	35	27	149	159	133	154	130	115	144	176	145	48	183	11	10	155	95	73	122	108	99	86	119	0	126	132	138	0	0	48	52	23	54	149	111	0	0	0	0	0	99	74	75	76
2013-07-07	0	29	27	21	25	24	19	207	218	193	242	203	156	211	252	188	69	264	8	8	179	104	85	153	112	106	113	131	8	183	0	0	8	0	30	32	17	40	165	0	13	8	10	8	0	107	88	82	84
2013-07-14	0	35	24	20	23	20	16	67	74	67	77	72	56	64	80	63	24	92	7	7	205	120	100	139	117	123	126	144	0	59	65	65	0	0	35	38	0	0	198	55	0	0	0	0	0	120	107	93	95
2013-07-21	0	59	17	16	16	14	12	76	87	78	89	89	72	97	109	79	28	108	6	7	249	128	120	152	147	147	167	155	8	70	22	22	7	0	59	64	10	22	253	18	15	8	9	10	0	129	121	104	106
2013-07-28	0	212	0	0	0	0	0	157	192	127	136	119	136	137	130	159	53	188	0	0	167	137	92	217	124	159	87	149	0	75	53	47	0	0	171	223	0	0	165	59	0	0	0	0	0	142	77	92	103
2013-08-04	25	99	43	60	55	44	45	128	142	103	109	98	97	98	98	105	43	144	17	16	134	130	73	133	95	125	84	127	0	63	37	28	0	29	81	98	47	129	136	35	0	0	0	0	25	122	70	78	96
2013-08-11	0	89	7	9	9	7	9	95	96	72	70	65	62	81	97	68	31	100	3	3	208	187	109	279	135	195	130	189	7	42	34	28	6	0	66	81	0	0	194	41	12	6	9	14	0	174	118	119	142
2013-08-18	0	30	6	7	7	7	8	44	35	30	26	25	22	41	36	21	13	36	2	3	160	161	98	187	116	129	159	152	4	16	60	55	3	0	23	28	14	33	165	57	5	3	4	8	0	136	124	103	113
2013-08-25	0	197	0	0	0	0	0	36	25	24	27	27	17	31	31	15	10	31	0	0	212	225	136	239	196	165	241	214	11	13	44	58	7	0	155	192	0	0	241	46	11	7	12	27	0	190	195	144	148
2013-09-01	0	57	19	31	16	17	26	74	56	47	60	54	36	63	79	33	24	62	7	13	173	217	113	298	168	123	235	174	0	31	120	124	0	0	49	52	0	0	231	103	0	0	0	0	0	149	169	129	120
2013-09-08	96	66	20	40	15	17	27	67	50	47	56	52	34	79	65	39	23	62	7	9	134	193	152	265	149	109	222	140	12	35	20	18	2	62	56	57	0	0	190	19	3	2	4	7	60	128	136	105	93
2013-09-15	114	31	23	39	18	22	26	67	51	50	62	62	46	73	61	59	22	60	8	14	130	260	177	197	186	169	211	145	30	37	13	12	3	92	26	26	25	61	209	12	10	5	8	13	75	132	125	133	105
2013-09-22	132	31	42	60	34	41	71	46	37	38	52	51	37	47	56	42	17	47	15	22	259	355	341	262	255	264	293	193	44	25	13	11	4	111	27	23	0	0	286	11	19	6	9	13	79	192	143	192	151
2013-09-29	207	67	18	22	13	16	36	65	44	48	55	72	48	64	71	63	23	60	7	7	289	390	328	278	291	284	235	185	190	53	45	34	13	204	55	49	0	0	306	28	62	29	36	39	115	174	128	233	167
2013-10-06	178	83	30	37	24	26	45	106	89	94	113	127	88	124	137	104	38	108	13	18	286	456	330	341	334	375	301	198	18	97	57	42	1	224	79	64	10	13	371	30	4	2	3	3	97	180	160	255	185
2013-10-13	108	78	52	47	44	49	66	109	121	92	125	139	91	111	169	103	43	112	25	28	249	320	202	208	196	253	208	131	82	103	79	66	7	119	73	59	0	0	260	49	23	19	20	23	53	134	111	168	125
2013-10-20	171	144	55	38	47	46	55	70	71	59	73	80	63	77	110	82	31	70	26	23	320	346	225	237	240	258	282	153	19	61	81	78	3	167	149	155	26	54	287	48	12	9	10	8	70	164	189	180	138
2013-10-27	248	113	222	232	235	208	242	140	105	90	110	118	101	125	206	173	52	112	85	95	348	388	321	314	274	325	253	174	43	100	117	132	11	308	121	133	30	71	344	102	47	32	39	26	122	189	247	228	151
2013-11-03	316	311	289	275	332	263	352	149	110	88	134	116	117	159	160	147	63	117	110	129	401	449	411	385	369	516	306	217	34	78	181	173	12	442	368	432	22	48	358	177	43	39	37	36	201	194	295	242	233
2013-11-10	224	488	467	542	643	394	553	199	132	129	155	129	158	190	211	180	84	143	204	258	416	417	384	321	551	427	434	227	80	86	269	255	35	277	426	586	42	96	417	343	87	77	93	75	140	185	297	242	222
2013-11-17	554	504	623	616	849	483	787	282	173	128	153	150	180	173	254	193	98	156	251	371	387	489	733	365	518	511	583	301	103	100	474	405	51	702	444	657	53	95	497	515	84	70	116	78	351	233	447	276	292
2013-11-24	962	691	918	1246	1540	670	1122	439	265	215	320	295	330	312	323	305	161	253	433	548	464	555	787	371	694	542	748	491	252	176	574	464	112	617	618	867	103	164	638	519	170	149	223	209	472	282	512	429	369
2013-12-01	1531	1184	1062	1501	1416	769	1134	613	433	367	543	540	521	489	570	518	296	419	659	812	1176	1051	1231	806	994	804	1777	1389	291	308	1094	953	138	941	1369	1869	229	340	1213	795	261	233	294	308	661	625	1120	901	908
2013-12-08	2083	1961	1207	1482	1583	1506	1491	897	1094	631	864	1140	812	1023	1071	885	539	684	1212	1218	758	764	1011	662	639	727	1269	1033	495	623	1248	886	385	1080	3679	3357	192	332	962	688	870	859	477	908	1545	522	1010	548	607
2013-12-15	5319	2966	1407	2876	2230	1737	2464	1463	1592	1330	1795	2455	1696	2343	2758	1858	1040	1013	2563	2614	1494	1037	2289	1157	1456	1369	3122	1678	1677	1628	1940	1194	555	1680	6417	6499	507	835	1124	1482	1358	2594	703	1695	2233	1385	2087	1090	1911
2013-12-22	6401	3548	2900	3958	2561	2843	4634	1845	2976	1867	2727	4691	3929	3632	4110	4375	1133	1397	3700	3332	2045	1221	3810	1293	2590	2213	3744	3026	3321	3252	3605	3526	998	2956	8700	6486	1211	1273	2495	3573	3714	3786	1992	4173	2922	2741	3293	1505	3154
2013-12-29	3806	7484	2854	4572	2422	3424	4778	3893	5485	4875	4478	8422	4189	4646	5688	5384	1337	2866	4000	2915	1954	1186	2353	1548	1748	2068	2674	2394	3747	5744	4432	4836	3591	4523	7199	6441	1753	1071	2114	3890	4121	5131	5885	4775	3849	2720	2789	2984	4308
2014-01-05	2866	6182	4604	3931	3380	3184	3705	5280	5202	4128	4499	8090	6764	5586	5539	5257	1720	5503	2851	2437	2247	1755	1960	1590	1725	1652	2233	2739	4217	4505	3261	3467	4652	4455	4236	3654	2069	1497	2020	3251	3636	4251	4462	3555	3974	2971	2830	2314	3481
2014-01-12	2113	5432	5027	3751	3799	3239	4729	5783	4169	3840	4175	5614	5421	4269	5962	5178	1604	6060	1758	1771	2223	2240	2204	1615	2154	2123	2187	3062	2613	3813	2533	2472	4387	2952	3125	3107	1986	1456	2598	2377	2593	2363	3259	2746	2418	4034	2249	2083	2718
2014-01-19	1331	3601	3562	2745	2859	3603	3296	5046	3872	4039	3732	5256	4546	4054	4321	4195	1660	4009	1558	1135	2100	2106	1929	1563	1632	2134	1903	2401	1896	2620	2447	2237	2085	2110	2522	2373	1222	1323	2378	2743	1831	1679	2319	1714	1724	3136	1886	2080	1822
2014-01-26	864	2526	2132	2306	2260	1599	2227	3087	2991	2755	2303	3409	3908	2577	3099	3289	1574	2493	793	700	1504	2455	1878	1701	2041	1222	1387	1827	1522	1519	1555	1753	972	1282	2070	1705	1558	1146	1962	2066	1215	1013	2350	1306	1296	2443	1700	1941	1536
2014-02-02	447	2065	1500	1638	1557	1297	1663	2428	2154	1753	1736	2330	2638	1534	2318	1818	1324	1916	545	391	1791	2179	1711	1752	1477	1239	1190	1695	1016	1122	1228	1357	607	677	1608	1136	1180	1482	1966	1577	786	505	1320	687	752	2020	1087	1615	1370
2014-02-09	396	1762	1157	1133	1349	980	1271	1409	1357	1007	981	1354	1556	1073	1360	1118	849	1339	454	289	1524	1608	1371	1322	951	982	791	1424	825	675	856	841	555	620	1145	908	946	1196	1795	990	612	446	836	427	663	1672	809	1069	1029
2014-02-16	206	1092	694	518	928	574	709	1252	972	781	878	1124	1266	904	1223	1011	680	1143	293	182	1224	1216	889	890	911	859	645	1056	584	645	751	808	372	303	953	923	676	1072	1376	809	541	288	541	308	375	1318	578	810	849
2014-02-23	246	897	647	432	747	460	660	958	699	553	621	809	941	685	711	669	530	847	263	201	652	784	634	677	483	580	455	696	285	534	599	620	181	325	915	719	392	984	830	622	242	160	230	208	490	819	463	561	589
2014-03-02	170	843	443	426	594	407	465	703	507	527	434	536	658	537	485	520	400	624	194	136	618	634	509	476	360	495	302	592	325	384	408	444	208	234	921	611	442	873	688	400	272	217	274	167	302	659	446	530	516
2014-03-09	182	731	400	333	458	379	378	662	527	640	455	583	608	537	529	479	399	616	169	143	427	471	366	350	357	375	268	479	252	346	353	382	123	250	777	515	505	923	529	318	218	192	213	185	314	532	250	436	448
2014-03-16	114	699	375	319	380	303	445	457	331	412	354	372	455	310	445	360	271	416	152	163	655	587	473	513	520	480	400	601	176	246	253	359	80	162	852	493	680	1166	673	338	162	122	155	127	214	686	504	537	584
2014-03-23	122	701	434	510	481	368	542	420	306	345	375	332	369	325	332	405	251	386	147	172	602	477	470	410	481	402	389	498	166	207	317	386	74	180	798	562	824	1039	603	410	182	121	134	105	239	596	415	455	468
2014-03-30	194	757	456	343	450	478	422	376	265	293	288	281	332	255	386	478	220	326	130	164	402	549	384	420	454	398	281	461	218	189	366	408	92	267	772	790	1000	992	622	466	249	158	179	134	321	563	326	461	392
2014-04-06	153	506	467	449	400	632	424	344	248	272	334	318	318	323	410	388	230	319	113	167	622	777	553	478	615	549	393	607	250	171	365	353	222	197	530	505	1038	1052	776	379	233	167	230	220	247	824	495	655	452
2014-04-13	87	408	768	667	501	649	886	307	242	265	287	301	309	256	279	484	210	265	177	162	566	671	435	356	453	415	335	519	163	162	315	297	127	116	406	444	927	964	736	351	172	133	152	90	131	742	368	633	371
2014-04-20	138	393	672	651	469	626	776	254	195	209	187	233	223	164	240	347	154	212	205	186	629	781	445	420	591	416	374	515	213	120	550	473	151	170	362	465	792	884	671	563	222	165	229	134	170	757	350	671	385
2014-04-27	0	318	753	727	687	644	702	428	310	358	400	372	399	333	419	512	233	340	243	222	643	720	422	497	526	368	403	526	203	197	378	301	113	0	327	357	530	729	752	416	241	133	203	121	0	720	351	630	395
2014-05-04	53	233	1059	751	875	965	736	367	261	294	329	360	321	294	315	594	199	318	274	225	593	559	355	445	474	371	304	433	148	163	254	209	91	80	235	298	238	419	630	282	224	117	147	114	79	667	317	541	320
2014-05-11	26	360	862	734	947	826	608	534	395	386	483	543	423	462	519	635	286	514	216	252	411	444	313	383	354	398	336	358	132	273	207	207	79	42	358	373	134	297	512	260	165	98	132	93	37	545	227	440	272
2014-05-18	47	201	879	838	794	651	623	508	399	389	437	549	398	550	505	449	277	502	183	265	336	373	235	331	292	315	259	297	114	306	138	128	62	66	199	239	78	196	421	171	125	81	110	74	62	444	200	349	276
2014-05-25	77	92	937	717	729	595	759	733	680	541	819	819	557	786	644	1420	396	702	199	231	352	326	263	522	281	309	287	293	134	463	69	71	76	101	90	119	29	70	408	83	139	90	116	92	97	434	230	331	267
2014-06-01	0	188	612	430	450	390	463	695	672	529	705	738	493	629	716	1166	368	645	145	145	292	313	263	417	294	287	171	259	29	547	52	65	16	0	193	224	19	36	320	64	27	18	25	23	0	354	226	268	214
2014-06-08	17	267	295	199	228	199	230	571	590	447	488	651	415	457	555	1090	307	556	70	56	347	351	272	586	358	372	199	288	24	431	10	15	11	19	291	294	8	15	387	15	22	15	19	17	19	396	216	311	253
2014-06-15	0	63	320	214	257	201	240	486	461	375	368	583	351	373	465	925	245	453	74	73	259	255	204	360	223	283	143	213	23	405	59	68	12	0	66	64	9	16	277	75	21	14	20	16	0	276	157	227	204
2014-06-22	42	30	265	159	202	160	173	413	394	345	400	489	307	495	330	926	218	399	63	49	223	238	192	363	186	266	133	211	18	373	35	42	8	41	32	28	29	61	273	48	16	11	16	15	43	259	150	221	194
2014-06-29	0	34	139	80	101	73	84	352	317	313	313	402	259	441	346	748	185	350	33	29	304	297	242	539	209	329	125	268	0	301	14	19	0	0	38	37	0	0	360	22	0	0	0	0	0	342	198	277	243
2014-07-06	20	21	44	27	31	23	25	409	376	360	310	460	291	392	381	819	232	409	9	12	252	232	212	332	188	234	150	214	27	335	16	19	24	21	24	23	0	0	301	23	27	18	22	20	23	266	187	211	180
2014-07-13	0	17	26	15	17	13	14	314	285	293	300	337	209	255	321	825	178	323	5	7	190	151	131	195	134	138	122	147	13	235	29	29	14	0	20	19	0	0	198	37	15	10	11	15	0	174	114	136	126
2014-07-20	0	21	13	9	9	7	7	282	301	255	241	311	188	213	288	879	192	308	3	3	206	151	128	163	136	131	109	151	4	204	41	29	4	0	24	23	11	21	198	39	5	3	3	4	0	175	125	137	132
2014-07-27	17	11	39	26	27	21	21	381	399	331	331	436	256	355	337	1570	273	392	9	8	110	75	62	105	65	72	46	77	4	264	19	15	3	21	12	13	0	0	96	20	5	3	3	4	24	85	59	71	65
2014-08-03	15	23	12	8	8	6	6	259	273	218	275	293	169	317	274	1198	185	260	3	3	80	57	45	78	53	69	35	58	22	173	121	85	16	19	24	31	12	28	75	117	31	16	17	23	22	64	43	51	50
2014-08-10	0	12	0	0	0	0	0	250	244	220	183	264	162	325	239	575	170	232	0	0	153	111	87	127	89	115	73	119	12	149	74	89	8	0	13	12	6	17	154	103	17	10	10	15	0	128	76	93	101
2014-08-17	0	48	36	22	25	25	21	309	299	295	379	336	234	348	330	588	206	317	10	12	132	96	71	94	90	116	61	104	5	170	37	32	3	0	54	50	14	25	138	33	7	4	4	5	0	109	85	81	90
2014-08-24	0	37	17	11	12	14	10	268	259	253	244	309	209	293	389	640	176	288	6	6	142	92	76	88	84	96	61	102	5	145	83	101	3	0	46	37	30	68	133	94	7	4	4	5	0	105	91	77	98
2014-08-31	9	14	7	5	4	6	5	231	213	235	268	283	174	352	270	355	156	240	3	2	157	86	70	81	117	92	70	100	11	131	36	30	9	13	17	14	0	0	129	26	21	9	9	12	15	99	128	71	94
2014-09-07	17	38	4	4	3	4	4	277	265	290	346	435	236	400	405	704	185	297	3	2	101	63	45	78	101	70	58	69	3	166	22	18	4	23	47	47	0	0	89	16	9	2	3	4	26	64	86	51	63
2014-09-14	0	62	27	23	22	28	31	228	215	229	327	410	311	251	291	643	145	229	15	13	242	100	68	141	187	96	86	100	10	144	71	55	10	0	77	79	0	0	220	48	28	7	8	11	0	103	111	75	139
2014-09-21	0	98	30	23	24	42	38	220	210	269	302	816	304	456	327	498	142	125	14	17	243	116	67	135	146	127	120	101	8	131	60	41	10	0	123	121	12	12	214	39	20	6	6	10	0	109	101	76	130
2014-09-28	40	85	37	34	49	62	43	123	121	191	243	581	185	291	181	199	81	65	18	18	252	207	106	182	258	194	173	131	28	71	56	40	32	33	110	100	52	57	307	31	66	21	21	37	26	141	137	99	165
2014-10-05	69	138	61	88	65	99	63	149	175	223	278	605	246	305	318	227	109	84	24	32	388	482	126	307	260	262	177	156	25	90	70	57	23	48	173	166	30	25	333	42	61	22	18	28	39	154	184	109	184
2014-10-12	153	168	59	103	66	86	53	190	233	365	406	725	309	286	393	313	138	115	20	37	468	645	198	366	534	515	272	197	30	134	92	117	36	79	218	233	43	44	395	49	67	35	21	40	62	192	296	134	261
2014-10-19	137	225	92	92	90	98	69	190	225	366	395	540	275	328	400	480	134	119	29	39	370	774	238	261	350	351	289	177	32	133	128	180	46	75	301	416	20	21	367	83	67	40	25	42	65	191	300	117	250
2014-10-26	116	335	231	250	236	223	229	255	295	455	400	586	368	436	481	417	173	188	112	110	489	811	330	373	417	389	337	214	32	221	172	216	41	72	503	863	34	36	468	125	65	40	26	48	52	303	268	236	280
2014-11-02	110	548	361	351	371	373	354	351	494	580	604	1082	464	657	731	417	220	240	191	166	568	1033	484	513	520	628	650	306	65	301	234	253	81	85	1042	1507	34	31	564	221	153	100	53	129	77	392	422	323	395
2014-11-09	180	711	395	532	437	405	467	369	512	704	607	1146	496	668	760	352	237	242	216	259	527	922	492	653	583	708	411	298	107	409	411	355	113	145	1710	2101	33	35	543	353	234	142	90	230	143	408	512	368	366
2014-11-16	314	1153	673	790	869	676	710	398	475	620	656	1137	475	543	570	369	223	343	428	554	780	1064	711	907	1018	1034	1074	446	211	437	925	624	213	272	2730	3019	43	51	669	632	430	381	188	640	287	667	782	506	476
2014-11-23	906	1515	1282	1181	1372	1258	1010	389	458	640	584	1005	511	446	634	753	221	398	598	1413	1115	1255	1021	1092	1521	1406	1280	834	357	419	1521	1226	324	759	3843	4299	110	148	841	1056	877	967	419	1398	616	752	830	699	553
2014-11-30	1884	1616	1902	1564	2290	1560	1637	646	669	937	820	1172	697	745	1055	978	302	648	753	1733	1239	1533	1272	1330	1390	1548	1715	2081	1022	686	2258	2169	487	1676	4765	4932	125	214	878	1339	1554	1607	694	2038	635	911	1506	833	731
2014-12-07	2046	1962	2123	2249	2694	2186	1825	1162	865	1110	1181	1263	923	929	1529	1171	399	1093	1512	2576	1684	1523	1460	1323	1573	1414	2182	2187	1749	907	3951	3582	974	2380	4960	4914	201	384	1065	1971	5119	3020	1496	3333	769	1170	1854	1077	858
2014-12-14	6421	4328	2105	2910	3219	2405	2888	1354	1248	1389	1991	1727	1345	1841	2357	1313	494	1427	5203	5445	3482	1974	2307	1849	2663	3300	4206	4780	3185	1813	5983	5974	2333	6851	6770	6538	317	598	2818	5239	7118	4830	4070	5340	1496	1823	4241	2022	1793
2014-12-21	8052	9980	2265	3713	3518	3237	3274	2210	1918	1963	2809	2523	1844	2594	3148	2452	718	1938	5929	7496	5307	2351	3550	2821	4634	3747	5866	6165	6325	3576	5749	8708	5380	11181	7808	6504	722	944	4567	10194	8600	6237	9629	6269	2080	6054	6985	6294	4663
2014-12-28	5075	7737	3094	5618	3273	3592	3845	2453	2447	2635	3732	2857	1955	3443	4175	3060	992	1744	6459	5070	4406	2356	3244	2142	3210	2543	3813	5168	6966	4309	3400	4057	4368	7865	5848	5202	1486	792	5340	5501	6490	4284	7948	3756	1668	8254	6066	5955	4887
2015-01-04	1892	5459	3788	5517	2991	4043	3689	5029	3587	5760	5924	3836	3301	6254	6058	2849	2191	2184	3881	3443	3068	2081	2073	1700	2230	1580	2259	3495	5367	4213	1661	1995	3881	3635	3977	3482	1283	1051	3421	2792	2946	3323	4190	1970	1170	4824	2820	2978	3457
2015-01-11	1704	5863	4571	3547	2899	4423	5047	6525	4130	4488	5916	6465	4231	5762	6746	4577	2692	3207	2227	3098	2281	1969	1410	1233	1292	1421	1703	2682	3258	5441	1067	1036	3005	2332	3916	3984	2410	1798	2401	1614	1767	1961	2821	1333	1235	3249	2664	2094	2563
2015-01-18	1654	4739	4214	3647	2599	4279	4335	6052	3270	3495	4940	4541	4714	5513	6746	3109	4366	3831	1673	2685	2040	1539	1110	899	1126	1556	1667	2663	2316	3732	837	629	2631	1757	2995	3933	2808	2777	1768	1293	1807	1432	2056	1341	1315	2551	2181	1587	2251
2015-01-25	1207	3925	3402	3780	3277	3249	3007	5256	3320	4723	4575	4831	4075	5730	5208	3881	4203	4084	1209	2199	1535	1155	879	560	732	934	1238	1990	1757	3249	653	506	2333	1485	2676	3076	2313	2575	1202	882	1173	1063	1600	1156	1747	1880	1781	1272	1553
2015-02-01	1545	2859	2668	1940	2695	2148	2180	4887	3154	3978	3532	3772	3142	3264	4413	2846	3251	4346	848	1310	994	961	640	382	654	591	768	1473	1128	2980	420	403	1705	1525	2087	2064	1835	2711	841	726	786	521	1146	714	1745	1760	1046	862	1123
2015-02-08	2107	2420	1454	1302	1457	1141	1083	3482	2653	2111	2041	3019	2358	2026	2746	1671	2203	3284	469	782	864	750	581	297	527	516	778	1191	905	1748	386	359	1212	1396	1990	1837	1112	2203	725	555	706	475	883	699	1648	1409	961	792	1142
2015-02-15	1505	2156	1475	1123	1345	1167	1019	2327	1875	1541	1412	2712	1891	2184	1925	2106	1772	2486	507	716	702	629	591	469	537	543	707	1100	844	1247	266	263	990	1271	1544	2015	696	1838	662	391	663	761	960	517	1835	1197	629	1061	1108
2015-02-22	1678	1736	1233	724	1116	1098	1008	1791	1435	996	1031	2054	1363	1172	1311	1572	1369	2301	512	493	570	517	541	607	419	655	653	911	928	1057	419	414	832	1181	1500	1607	560	1654	552	501	669	895	913	401	1683	976	526	809	796
2015-03-01	1571	1728	1064	817	1093	1009	982	1681	1324	932	1019	1845	1143	1065	1077	1196	1276	2010	515	458	578	603	687	439	520	546	662	926	849	1022	636	571	732	1113	1595	1726	523	1419	555	542	914	660	777	729	2170	938	604	764	736
2015-03-08	1207	1525	965	958	1353	1067	1495	1140	895	660	766	1202	909	626	1078	824	850	1286	470	444	515	480	535	295	412	376	506	727	853	717	933	684	726	817	1293	1499	536	1167	457	740	1017	637	688	911	1682	705	560	521	554
2015-03-15	867	1083	670	622	916	742	912	1025	811	927	779	1044	762	653	847	658	770	1144	331	391	470	445	572	281	398	305	439	673	813	617	932	877	568	678	992	962	512	1133	438	761	931	493	408	541	1361	627	482	472	483
2015-03-22	601	776	599	537	528	622	784	751	634	704	510	761	622	620	717	591	592	838	317	232	401	374	413	208	342	264	334	553	672	439	774	711	517	527	663	583	443	1047	392	727	822	498	473	498	993	491	279	451	354
2015-03-29	238	766	573	679	601	603	645	649	772	696	501	693	507	623	753	535	548	690	336	240	336	312	389	179	273	216	260	449	628	339	889	704	477	246	644	515	434	1016	403	957	651	420	350	397	447	383	220	363	276
2015-04-05	354	459	578	568	598	576	667	584	627	553	395	657	463	476	606	340	434	591	307	215	392	357	347	150	194	240	184	444	556	269	711	592	419	431	428	303	421	740	414	814	434	384	287	262	725	342	209	353	255
2015-04-12	150	243	478	485	452	533	524	597	598	548	312	560	530	385	634	287	427	544	222	150	296	314	287	164	193	212	186	415	448	268	427	415	288	191	226	174	304	694	380	671	349	248	238	188	325	306	187	344	222
2015-04-19	94	174	464	335	656	448	447	575	568	480	354	584	527	349	654	298	415	506	175	121	185	205	205	131	139	127	110	275	270	246	300	246	182	123	158	126	188	513	247	427	267	168	173	135	211	205	100	209	144
2015-04-26	103	89	369	266	497	347	371	529	477	403	364	508	438	317	489	280	360	447	149	98	177	204	186	121	202	124	116	291	202	222	325	197	143	151	86	62	147	405	237	368	177	126	150	88	235	206	101	201	146
2015-05-03	61	108	446	615	599	427	402	560	468	419	378	560	448	331	580	334	398	465	166	96	177	166	148	93	139	115	114	246	168	221	214	164	110	92	111	81	171	380	189	300	147	92	111	73	144	182	97	158	127
2015-05-10	56	115	223	188	287	206	182	605	575	458	525	612	530	367	648	362	473	498	79	67	161	155	121	83	134	109	82	217	80	261	76	52	49	97	117	82	81	173	173	102	63	40	44	31	135	158	104	136	112
2015-05-17	0	55	142	100	173	155	137	365	380	275	334	378	388	234	295	234	312	301	49	54	147	139	114	93	104	104	102	202	24	157	53	52	16	0	57	46	20	52	163	99	20	14	12	10	0	143	104	123	106
[truncated: 46 more columns]
